1

1 **Health service improvement using positive patient feedback:**  
2 **systematic review and change model**  
3 **Short title: Health service improvement through positive patient feedback**

4 Rebecca Lloyd<sup>1</sup>, James Munro<sup>2</sup>, Kerry Evans<sup>3</sup>, Amy Gaskin-Williams<sup>4</sup>, Ada Hui<sup>3</sup>, Mark Pearson<sup>3</sup>, Mike Slade<sup>1,5</sup>,  
5 Yasuhiro Kotera<sup>1</sup>, Giskin Day<sup>6,7</sup>, Joanne Loughlin-Ridley<sup>1</sup>, Clare Enston<sup>1</sup>, Stefan Rennick-Egglestone<sup>1\*</sup>

6

7 <sup>1</sup>School of Health Sciences, Institute of Mental Health, University of Nottingham, Nottingham, UK

8 <sup>2</sup>Care Opinion, Sheffield, UK

9 <sup>3</sup>School of Health Sciences, University of Nottingham, Nottingham, UK

10 <sup>4</sup>Nottinghamshire Healthcare NHS Foundation Trust, Nottingham, UK

11 <sup>5</sup>Nord University, Faculty of Nursing and Health Sciences, Health and Community Participation Division,  
12 Namsos, Norway

13 <sup>6</sup>Nightingale Faculty of Nursing, Midwifery and Palliative Care, King's College London, UK

14 <sup>7</sup>Faculty of Medicine, Imperial College London, UK

15

16 \*Rennick-Egglestone is the corresponding author: Institute of Mental Health, Triumph Road, Nottingham, NG7

17 2TU, UK. stefan.egglestone@nottingham.ac.uk

18

## 19 **Abstract**

20 **Background:** Patients, families, and communities regularly provide feedback about care and treatment  
21 received from healthcare services, most of which is positive. The aim of this review was to examine how  
22 positive feedback creates change within healthcare settings.

23 **Methods:** Included documents were empirical studies where the full text is publicly available in English, and  
24 where a change has occurred within healthcare services attributed to positive feedback from service users,  
25 their families, or the community. They were identified through database searches (ACM Digital Library, AMED,  
26 ASSIA, CINAHL, MEDLINE and PsycINFO), forwards and backwards citation, and expert consultation. Data was  
27 synthesised into a change model describing forms, mediators and moderators of change. A protocol was  
28 prospectively registered: <https://osf.io/5x46c>.

29 **Results:** Sixty-eight papers were included, describing research conducted in 32 countries across six continents,  
30 with qualitative (n=51), quantitative (n=10), and mixed (n=7) methods. Only two described interventional  
31 studies. The most common form of feedback was 'appreciation' (n=28). The most common recipients were  
32 nurses (n=29). Positive feedback was most commonly given in hospitals (n=27) and community healthcare  
33 (n=19). Positive feedback mostly led to positive outcomes categorised as (a) short-term emotional change for  
34 healthcare workers (including feeling motivated and improved psychological wellbeing), (b) work-home  
35 interactional change for healthcare workers (such as improved home-life relationships), and (c) work-related  
36 change for healthcare workers (such as improved performance and staff retention). Undesirable changes  
37 included embarrassment when receiving feedback, tension in the patient-professional relationship, and envy  
38 when not receiving positive feedback.

39 **Conclusion:** Positive feedback can provide the opportunity to create meaningful health service change.  
40 Healthcare managers may wish to use positive feedback more regularly, and to identify and address barriers to  
41 staff receiving feedback. Further interventional research is required to establish the effectiveness of receiving  
42 positive feedback in creating change, and to understand the influence of feedback content.

43 **Keywords:** patient feedback; change model; complex intervention; systematic review; health service

## 45 Introduction

46 The term 'feedback' often refers to the process whereby the effect of an action is fed back to change future  
47 actions. Feedback can be positive, where the gap between actual and desired experience is narrow, for  
48 example, when healthcare treatment aligns with patient wishes. Feedback can also be negative, where the gap  
49 between actual and desired experience is wide (1). For example, when healthcare treatment falls short of  
50 patient wishes. People working in health services regularly receive feedback about the treatment provided to  
51 patients, including from the patients themselves, family members, and informal carers (2). Patient feedback  
52 differs from patient engagement, which can be defined as patients taking an active role in their healthcare  
53 experience to meet a particular objective, such as accessing additional support groups (3).

54 The most frequent form of feedback from healthcare service users is informal feedback, usually exchanged  
55 through conversations day-to-day (2), but also via letters and online forums (4). Formal feedback is a  
56 structured evaluation, often collected through methods such as national or local surveys (5). Both types of  
57 feedback can be given in-person or online and can include generic content (such as 'fantastic care'), or specific  
58 (such as 'the food was fantastic during my hospital stay') (6). Some feedback is solicited, such as staff  
59 requesting patients to complete feedback surveys (7) , whereas some is unsolicited (8).

60 Positive feedback is much more common than negative feedback, with a linguistic analysis of comments  
61 posted on the UK's National Health Service (NHS) Choices website finding positive evaluations to be three  
62 times as likely as negative (6). Positive feedback tends to be shorter, often expressed just as a single word such  
63 as 'fantastic' (9), and may be conceptualised as including material displays, such as gift-giving, cards, and  
64 donations to healthcare services (10). Positive feedback is evident in a variety of forms, such as favourable  
65 responses to surveys (4), online comments (9), compliment letters (11), and informal thanks (4). Positive and  
66 negative evaluations may also be given in combination, forming 'mixed' feedback (12). Increasingly, feedback  
67 is received through online sources, with online feedback being mostly positive in tone (13). Expressions of  
68 positive feedback may differ culturally; British culture tends to be less emotionally expressive than American  
69 culture (14). Eastern cultures tend to value low arousal emotions such as peacefulness, whereas Western  
70 cultures tend to value high arousal emotions such as happiness (15).

71 One purpose of collecting service user feedback is to assist with performance monitoring and assurance, such  
72 as comparison between healthcare providers, impact of service changes, informing commissioning decisions,

73 and compliance with standards. Another purpose is to share understanding and information to assist with  
74 service choices for other service users, highlight service problems and hold services accountable, and increase  
75 staff understanding of service user experience (16).

76 Service users may want to give positive feedback to acknowledge, reward, and promote desired behaviour in  
77 healthcare staff (11). This frequently includes expressions of gratitude, conceptualised as the communication  
78 of an emotion or state which signals recognition that others have done something to benefit us (17).

79 Expressions of gratitude and positive feedback are interrelated, but not synonymous. Gratitude can describe  
80 an individual's attitude, moral values, daily habits, or emotional state, with the intention of reciprocity often at  
81 its core (17).

82 In some cases, expressions of gratitude can serve as a positive evaluation of an individual or group  
83 accomplishment, and therefore be a form of positive feedback. For example, grateful postcards and letters  
84 sent to palliative care units from patients and families recognised the care and treatment received, the value  
85 of palliative care, and offered messages of support and encouragement about the service (18). Similarly,  
86 throughout the COVID-19 pandemic, many healthcare service users used Twitter to express their gratitude for  
87 the work, effort, saving and caring of healthcare staff and services (19). However, not all expressions of  
88 gratitude will be given with the intention of recognising accomplishments, such as habitually thanking  
89 healthcare staff in the expectation that it would ensure continuation of good treatment (20). Similarly, not all  
90 positive feedback will include expressions of gratitude, with some offering objective descriptions of excellent  
91 care and treatment practices. The current review will characterise expressions of gratitude towards healthcare  
92 staff as a type of positive feedback, acknowledging how these concepts interrelate and discriminating between  
93 them where possible.

94 Patient feedback is given in abundance and the use of readily available patient feedback may offer a cost-  
95 effective way to create meaningful change within healthcare services (4). In one case study, service user  
96 accounts of distress during admission to mental health inpatient services were used as a resource to inform  
97 service improvement work. An 80% drop in complaints was observed over the following 14 months after  
98 implementation (21). Similarly, the NHS in England uses the Friends and Family Test (FFT) to collect  
99 information about patient experience of what is going well and what needs improving (22). The FFT was able  
100 to highlight positive patient views about remote appointments during the pandemic. In Buckinghamshire

101 Healthcare NHS Trust, for example, patients felt that video or telephone appointments were safer, saved time,  
102 removed need for finding and paying for parking, allowed more time for talking, was better for the  
103 environment, and were more likely to be on time (23). This provides valuable insight in how patients are  
104 experiencing changes to healthcare services. In Japan, healthcare workers also reported that positive  
105 communication and acknowledgement, including from patients, acted as a mental health resource during the  
106 Covid-19 pandemic (24).

107 Formal processes exist within healthcare services, such as the UK's NHS, to use service user feedback. In the  
108 UK, registered healthcare professionals are often required to collect and reflect on service user feedback as a  
109 formal requirement of practice. The UK Nursing and Midwifery Council (NMC) describe the process of  
110 revalidation required for all nurses and midwives in the UK to maintain their registration with the NMC,  
111 promote good practice, and strengthen public confidence (25). The revalidation process requires five pieces of  
112 feedback which can come from a variety of sources and forms, including from service users. Similarly, the  
113 General Medical Council (GMC) require reflection on feedback from service users at least once in each  
114 revalidation cycle, which is required every five years (26). Doctors with the GMC are encouraged to reflect on  
115 feedback from existing sources of patient feedback, such as letters, cards, or team feedback, and should cover  
116 the whole scope of their practice. However, the Health and Care Professionals Council (HCPC) standard  
117 guidelines state that asking for, receiving, and reflecting on service user feedback is not a specific requirement,  
118 but can be useful for continuing professional development (CPD) (27). This feedback refers to evidence that  
119 changes made in line with CPD standards have been beneficial to the service user, such as letters produced for  
120 a CPD audit. Positive feedback from service users therefore has the potential to be used in current formal  
121 practice requirements for UK healthcare professionals. However, some have described the process as a 'hoop  
122 jumping' exercise with no impact on patient care, and some take issue with using feedback because patient-  
123 facing working patterns do not create equitable patient-facing opportunities (28).. The infrequency at which  
124 patient feedback is required for formal processes may contribute to the view that patient feedback is  
125 unrepresentative and tokenistic. Despite expressing sceptical views, healthcare staff have described its value  
126 as beneficial (28).

127 Feedback can also be used for quality improvement. Aggregating feedback can provide insight into quality of  
128 care for service users and highlight real-time priorities for service inspections and improvement (29). The NHS

129 promotes two models for improving quality by implementing changes (30). The first is the five-step  
130 improvement approach, which offers a systematic framework for improvement projects. The five stages are  
131 preparation (preliminary planning such as defining aims, objectives, and collecting baseline data), launch (the  
132 official start of a project), diagnosis (understanding the current process and defining the problem being  
133 addressed), implementation (testing potential solutions to the problem), and evaluation (achievements and  
134 learning are captured to make improvements the norm in that service). The second quality improvement  
135 model fits into the implementation phase of the five-stage improvement approach. The model for  
136 improvement asks three preliminary questions: what are we trying to accomplish? How will we know that a  
137 change is an improvement? And what changes can we make that will result in the improvements that we seek?  
138 The model consists of four components: plan, do, study, act (PDSA). Improvements can be made by planning  
139 how to test change, carrying out what has been planned, measuring the outcomes of the test, and acting on  
140 the results to modify and improve services (30).

141 However, there are a range of organisational barriers to the effective use of patient feedback by health  
142 services (31). Staff can lack the time or skills required to interpret formal feedback (4), and might be reluctant  
143 to engage with feedback communicated informally through online platforms such as Facebook or Twitter (9,  
144 32). In some contexts, online feedback is emerging at a faster rate than health services could respond to (16).  
145 An example is Care Opinion, an online service for the collection of feedback that enables staff responses, but  
146 conversations are often closed with a 'thank you' in response to positive feedback (4) rather than with an  
147 account of how this feedback was used to create change. Even where informal feedback is acted on by  
148 healthcare staff, the improvements made are often informally implemented in real-time and hence are not  
149 captured by quality improvement methods (33). Formal methods of processing service user feedback are also  
150 focussed on complaints in healthcare and positive feedback is often overlooked as a useful source of feedback  
151 (34). Healthcare staff may assume that feedback is negative in tone (13), and can dismiss or fail to value  
152 positive feedback (9). The lack of credibility afforded to positive feedback may be due to its tendency to be  
153 shorter and may be viewed by staff working in quality improvement as lacking direct measurability compared  
154 with clinical outcomes or complaints (33).

155 Three reviews have investigated the value of gratitude in healthcare settings (35-37) . A meta-narrative review  
156 of 56 studies investigated gratitude in healthcare with a particular focus of interpersonal experiences (36). The

157 review described how gratitude can act as ‘social capital’ as it empowers and motivates recipients through  
158 strengthened social bonds, connectedness, and an increased willingness to reciprocate. Day (2020) also  
159 highlights how patient gratitude can benefit staff wellbeing, such as being protective against burnout and  
160 having physical health benefits and may be an indicator of quality of care. A scoping review (35) included 32  
161 studies from three databases, and examined the characteristics, focus, and effects of gratitude. It found that  
162 gratitude influenced healthcare professionals professionally and personally, generating positive feelings such  
163 as pride, satisfaction, and a sense of wellbeing. It also generated reciprocal gratitude among other healthcare  
164 professionals. The review highlighted a limited evidence base and concluded that a systematic investigation  
165 into the effects of patient gratitude was needed, in line with Medical Research Council (MRC)  
166 recommendations on intervention development processes (38).

167 A narrower systematised review on the impact of gratitude in healthcare settings included 23 studies from  
168 three databases (37). The review found one harmful change, where service user gift-giving resulted in  
169 healthcare staff feeling tension and pressure to meet patient expectations, undermining the service user-  
170 professional relationship. The review found that patient gratitude can also create helpful changes for  
171 healthcare staff, identified as work-related change (such as improved team performance and work-related  
172 satisfaction), direct benefits to staff health (such as increased sleep quality and decreased headaches), and  
173 proximal emotional change (such as feeling rewarded, proud, motivated, and fulfilled). In some cases, change  
174 was mediated by team information sharing, and was moderated by the psychological demands of the job role.  
175 A preliminary change model was produced as a result of the review findings which presented a summarised  
176 version of the change process. Following expressions of gratitude from patients, healthcare staff experience a  
177 change in their perceptions, either within their relationships with patients or colleagues or the way they  
178 experience work. Psychological demands of staff job role moderated this change. A change in perception lead  
179 to the harmful and helpful changes previously described, with helpful changes mediated by work-related  
180 satisfaction and increased information sharing.

## 181 **Aims and objectives**

182 Whilst three reviews have examined patient gratitude in healthcare settings, none has examined the impact of  
183 positive feedback more broadly. The aim of this review is to examine how positive feedback received by health  
184 services about care and treatment can create change within healthcare settings. The objectives were (1) to

185 identify measures used to quantify change; (2) to create a model describing types of change and how it occurs;  
186 and (3) to identify recommendations for the collection and use of positive feedback by health services.

## 187 **Methods**

188 A systematic review of empirical studies was conducted. Positive feedback was defined as a response from  
189 healthcare service users, families or the community indicating concordance between desired and actual  
190 experiences regarding their care or treatment, delivered to healthcare staff or systems. The 2021 update of  
191 the Preferred Reporting Items for Systematic Reviews and Meta-Analyses (PRISMA) checklist was used in  
192 reporting the review (39). A review protocol was prospectively registered with the Open Science Framework  
193 (<https://osf.io/5x46c>), which extended the protocol for a prior review (37), with extensions validated through a  
194 scoping review. A narrative synthesis of review data was performed to create a preliminary model of change  
195 (40).

## 196 **Search strategy**

### 197 *Electronic database searches*

198 Databases were selected to cover a range of domains relating to healthcare service delivery. Searches were  
199 conducted from inception to 18<sup>th</sup> March 2022 on PsycINFO, AMED, MEDLINE, CINAHL, and the ACM Digital  
200 Library (ACM DL), and from inception to 15<sup>th</sup> December 2021 on ASSIA (the shorter date was due to a  
201 constraint in institutional access). The ACM DL indexes papers where computation and human interaction with  
202 technology is a primary focus and was included as feedback is frequently collected via electronic systems.  
203 Search terminology was extensively tested during a previously conducted systematised review focusing on  
204 expressions of patient gratitude (37) , extended for the current review to encompass positive feedback beyond  
205 gratitude and healthcare systems more generally, and informed by the learning from the scoping searches.  
206 Scoping searches identified terms which were synonymous with ‘positive feedback’, such as ‘positive  
207 evaluation’ and ‘praise’, and terms which described healthcare systems, such as ‘healthcare services’ and  
208 ‘healthcare communities’.  
209 Search terms which linked less closely to positive feedback but produced a high volume of documents, such as  
210 recognition, were searched in titles only. In the initial filter by title, the screening team took care not to  
211 exclude papers in the event of ambiguity.



212 The following search strategy was used for MEDLINE, PsycINFO, and AMED (all searched through Ovid):

- 213 1. Health\* staff.ti,ab.
- 214 2. Health\* worker\*.ti,ab.
- 215 3. Medical staff.ti,ab.
- 216 4. Medical worker\*.ti,ab.
- 217 5. Exp Health Personnel/
- 218 6. Health\* system\*.ti,ab.
- 219 7. Health\* service\*.ti,ab.
- 220 8. Health\* organi#ation\*.ti,ab.
- 221 9. Health\* communit\*.ti,ab.
- 222 10. 1 or 2 or 3 or 4 or 5 or 6 or 7 or 8 or 9
- 223 11. Grat\*.ti,ab.
- 224 12. Appreciat\*.ti,ab.
- 225 13. Recog\*.ti.
- 226 14. Thank\*.ti.
- 227 15. Positive\* feedback.ti,ab.
- 228 16. Positive\* evaluat\*.ti,ab.
- 229 17. Praise\*.ti,ab.
- 230 18. 11 or 12 or 13 or 14 or 15 or 16 or 17
- 231 19. 10 and 18
- 232 20. Remove duplicates from 19

233

234 This search strategy was amended for CINAHL and ASSIA (amendments in S1 File).

235 The ACM Digital Library only allows searches constructed using combinations of keywords, which generates a  
236 series of online pages of possible matches in order of relevance. Keyword combinations were identified from  
237 the MEDLINE search strategy (searches in S1 File). For each keyword combination, results pages were  
238 sequentially inspected for potentially includable documents, and inspection was discontinued when three  
239 subsequent pages of non-relevant results were observed.

240 When developing the search strategy, documents from the prior review (37) were used as marker papers to  
241 evaluate search strategy sensitivity.

242 *Citation tracking*

243 Reference lists for included documents were manually inspected for further includable documents (backwards  
244 referencing). Forward referencing of included documents was conducted using Google Scholar. Forward and  
245 backward citation was repeated on additional included documents until no further documents were included.

#### 246 *Expert consultation*

247 Once the final list of includable documents from electronic databases was identified, three experts in  
248 healthcare service delivery were asked to identify any potentially includable documents which had been  
249 omitted. Experts consisted of a healthcare manager responsible for feedback, an academic expert, and a  
250 technology creator who collects feedback about healthcare. Proposed documents were inspected for inclusion  
251 by the researcher. Forwards and backward referencing was conducted on additional included documents  
252 identified during expert consultation and repeated until no further documents were included.

#### 253 **Document inclusion**

254 The Population, Intervention, Comparison, Outcome, Study Design (PICOS) search tool was used to specify  
255 inclusion (41).

#### 256 *Study design*

257 Included documents were empirical studies where the full text is publicly available in English, with a clearly  
258 defined research method. Documents were included where a change has occurred within healthcare services  
259 attributed to positive feedback from service users, their families, or the community. Change was inclusive of  
260 individual healthcare staff changes, such as behavioural, emotional, and attitudinal shift, and systematic or  
261 procedural change within healthcare structure.

262 Documents describing systematic, literature, or scoping reviews, policy statements, conference abstracts,  
263 protocols, and documents presented in a blog format were excluded. Documents were excluded where it was  
264 unclear whether change occurred as a result of positive feedback, where the identified change preceded  
265 positive feedback or directionality was ambiguous (e.g., where a change in healthcare staff or systems caused  
266 positive service user feedback), or where the impact of positive feedback was not presented as a study finding  
267 but was briefly mentioned as a discussion point.

#### 268 *Context*

269 Included documents described research in the context of a healthcare setting, defined as any formal service  
270 where healthcare is being delivered, such as in hospitals, outpatient services, hospices, healthcare education,  
271 or correctional medical facilities. This was not limited to private or public healthcare services. Documents  
272 describing community healthcare settings were also included if staff were providing a formal healthcare  
273 service in the community. Documents were excluded where they describe positive feedback occurring within a  
274 healthcare system in relation to research being conducted, such as feedback about participation in a  
275 randomized clinical trial.

### 276 *Intervention*

277 Included documents described the voluntary expression of positive feedback from healthcare service users,  
278 their families, or community members, relating to the care or treatment provided, with healthcare workers or  
279 healthcare services as recipients. This included positive feedback expressed verbally and in invariant forms  
280 (such as in writing), and positive feedback provided both in-person and remotely (such as online). Expressions  
281 of gratitude were included as they may indicate service user feelings about care and treatment and hence can  
282 be used as a source of information by healthcare staff or systems. Studies describing 'recognition' of  
283 healthcare staff or services in relation to appreciation of care and treatment provided were included.  
284 Documents were excluded if (1) the type of service user feedback was not identified as positive, was negative  
285 or mixed, ambiguous, or was hypothetical (2) the source of positive feedback was not healthcare service users,  
286 families, communities, or was ambiguous (3) positive feedback from healthcare service users, families, or  
287 communities was not distinct from feedback provided by peers or the organisation, or (4) expressions of  
288 positive feedback were not voluntary (for example, where service users felt that their care and treatment may  
289 be negatively impacted if they do not express positive feedback). Feedback was assumed to be given  
290 voluntarily unless otherwise stated. Documents describing recognition awards or honours informed by the  
291 treatment and care experiences of healthcare service users, such as the Diseases Attacking the Immune  
292 System (DAISY) Award (42), were excluded. Similarly, documents describing feedback given via Appreciative  
293 Inquiry (a strength-based approach to creating change with a focus on appreciation and positive  
294 conversations) were excluded if service user involvement was not explicitly stated or distinguishable from peer  
295 or organizational feedback (43). Documents describing donations or gifts to healthcare services were excluded  
296 if the motivation for donation was not explicitly described as positive feedback or gratitude towards the

297 healthcare staff or system (37). Studies which describe positive recognition of healthcare staff regarding social  
298 status rather than care or treatment provided, such as community support, approval, acceptance, or respect,  
299 were excluded (44). Studies were also excluded where healthcare service user satisfaction with care and  
300 treatment was described, but not explicitly delivered as positive feedback to healthcare staff or services.

### 301 *Participants*

302 Included documents described participants as working within a formal healthcare environment. The following  
303 were in scope: paid or volunteer workers within any healthcare system worldwide; students carrying out a  
304 formal healthcare role as part of their studies. Documents describing research into healthcare systems at an  
305 organizational level (e.g., where there were no staff participants) were also included. Healthcare systems were  
306 defined as any healthcare structure delivering care services to healthcare users.

307 Documents were excluded where authors did not state whether feedback was provided within a healthcare  
308 setting, if participant roles were informal such as unpaid familial caregivers, or if participants were unable to  
309 receive feedback.

### 310 **Analysis plan**

311 Documents from database searches were exported to EndNote (45) and duplicates were removed. Documents  
312 were screened for eligibility, filtered on title in stage one and abstract in stage two. Concordance checking was  
313 conducted on a randomly selected 20% of exclusions by a second researcher [SRE] for both stages (title and  
314 abstract) of exclusion. Selection processes were piloted until a concordance rate of 95% was achieved on  
315 exclusions. Stage 3 screened remaining documents for eligibility based on full text. Retrieved documents were  
316 reviewed for inclusion by two researchers, with 100% concordance required on inclusions and exclusions for  
317 Stage 3. Uncertainty about the eligibility of a document from both researchers led to it being carried forward  
318 to the next stage of screening. At Stage 3, reasons for exclusion were recorded and agreement was required  
319 between RL and SRE.

### 320 *Data abstraction and synthesis*

321 A data abstraction table (DAT) was modified from the systematised review (37) . The DAT was amended for the  
322 purpose of the current systematic review and was piloted using a small number of includable documents to  
323 ensure appropriate and efficient design.

324 The DAT categorised information about study context (such as country of study and healthcare setting), study  
325 methodology (such as measures and purpose of measures), recipients and givers of feedback (including  
326 healthcare role and healthcare service), type of positive feedback considered, and forms of observed change.  
327 For types of feedback, donations were recorded under the higher category of 'gifts'. The observed change was  
328 split into sections: outcomes, mechanisms, moderators, facilitators, barriers, and mediators.

329 Outcomes were defined as observed changes that have occurred following positive feedback. Mechanisms  
330 were defined as processes which produce change. Moderators were defined as factors which alter the degree  
331 of change following positive feedback. Facilitators were defined as factors enhancing the observed change.  
332 Barriers were defined as factors impeding the observed change. Mediators were defined as factors creating an  
333 indirect pathway between two variables for the change process to occur (46).

334 Specific links between outcomes, mechanisms, mediators, moderators, facilitators, and barriers were retained  
335 in the DAT, for example if an included document presented evidence that a specific outcome was produced by  
336 a specific mechanism. Items were listed in all relevant categories where there was variation in categorisation  
337 among studies. Where papers reported more than one study within a single paper, only data from relevant  
338 studies were extracted. Quality assessment score was also reported in the DAT, and if a section of the DAT was  
339 not clearly stated in a document, it was recorded as 'N/A'.

#### 340 *Change model development*

341 Each category was assessed for similar items and were combined to develop a synthesised typology. A  
342 preliminary change model was produced to describe outcomes, mechanisms, mediators, and factors  
343 enhancing or supporting change. Moderators, facilitators, and barriers were combined into two tables  
344 reflecting factors that enhance change and factors that hinder change. The change model was reviewed by an  
345 expert panel consisting of national and local health service representatives experienced with working with  
346 feedback, the director of a company providing a public online feedback platform (JM), and three experienced  
347 researchers.

### 348 *Subgroup analysis*

349 Subgroup analyses were planned for documents which identify change through expressions of healthcare  
350 service user gratitude, and for documents which were assessed as having high quality methodology. Quality of  
351 included documents was assessed using the Mixed Methods Appraisal Tool (MMAT) due to its rigorous  
352 assessment of mixed methods study methodologies and high applicability (47). An additional unplanned  
353 subgroup-analysis compared mainly public versus mainly private healthcare settings.

## 354 **Results**

### 355 **Summary of papers**

356 Database searches identified 17,619 records once duplicates were removed. Sixty-eight papers were included  
357 (see Fig 1). The PRISMA checklist is in S2 File.

358 Fig 1 – *PRISMA Flow Diagram of Included and Excluded Screening Process.*

### 359 **Characteristics of included studies**

360 A summary DAT is in Table 1, and the full DAT is in S3 Table. One included study presented methodology and  
361 results across two papers (48, 49) which were merged to form one record [ID 67]. Where several papers were  
362 created from a single study, these were considered companion papers. Three studies had corresponding  
363 companion papers [ID 3 and 4; ID 11 and 12; ID 45 and 46].

364 **Table 1 – Summary data abstraction table**

| ID | Reference                                                                                                                                                                                                                                                                                                                                  | Year | Country      | Study type                                    | Design        | Setting   | Sample size |
|----|--------------------------------------------------------------------------------------------------------------------------------------------------------------------------------------------------------------------------------------------------------------------------------------------------------------------------------------------|------|--------------|-----------------------------------------------|---------------|-----------|-------------|
| 1  | Akintola, O. (2010). Perceptions of rewards among volunteer caregivers of people living with AIDS working in faith-based organizations in South Africa: a qualitative study. <i>Journal of the International AIDS Society</i> , 13(1), 1-10. <a href="https://doi.org/10.1186/1758-2652-13-22">https://doi.org/10.1186/1758-2652-13-22</a> | 2010 | South Africa | Qualitative (Interviews)                      | Observational | Community | 55          |
| 2  | Akintola, O., & Chikoko, G. (2016). Factors influencing motivation and job satisfaction among supervisors of community health workers in marginalized communities in South Africa. <i>Human Resources for Health</i> , 14(1), 1-15. <a href="https://doi.org/10.1186/s12960-016-0151-6">https://doi.org/10.1186/s12960-016-0151-6</a>      | 2016 | South Africa | Qualitative (Interviews)                      | Observational | Community | 26          |
| 3  | Alam, K., & Oliveras, E. (2014). Retention of female volunteer community health workers in Dhaka urban slums: a prospective cohort study. <i>Human Resources for Health</i> , 12(1), 1-11. <a href="https://doi.org/10.1186/1478-4491-12-29">https://doi.org/10.1186/1478-4491-12-29</a>                                                   | 2014 | Bangladesh   | Mixed (Interviews Survey)                     | Observational | Community | 542         |
| 4  | Alam, K., et al. (2012). Performance of female volunteer community health workers in Dhaka urban slums. <i>Social Science &amp; Medicine</i> , 75(3), 511-515. <a href="https://doi.org/10.1016/j.socscimed.2012.03.039">https://doi.org/10.1016/j.socscimed.2012.03.039</a>                                                               | 2012 | Bangladesh   | Mixed (Questionnaire Focus groups Interviews) | Observational | Community | 542         |
| 5  | Alibhai, A. A. (2013). The effectiveness of a volunteer community health worker program to support an antiretroviral treatment program for AIDS patients in western Uganda. Available from ProQuest Dissertations & Theses A&I.                                                                                                            | 2013 | Uganda       | Mixed (Questionnaire Interviews Focus groups) | Observational | Community | 169         |

<http://nottingham.idm.oclc.org/login?url=https://www.proquest.com/dissertations-theses/effectiveness-volunteer-community-health-worker/docview/1504615762/se-2?accountid=8018>

|    |                                                                                                                                                                                                                                                                                                                                                                                                                         |      |                  |                                                             |               |                                                                                             |     |
|----|-------------------------------------------------------------------------------------------------------------------------------------------------------------------------------------------------------------------------------------------------------------------------------------------------------------------------------------------------------------------------------------------------------------------------|------|------------------|-------------------------------------------------------------|---------------|---------------------------------------------------------------------------------------------|-----|
| 6  | Aparicio, M., et al. (2019). Gratitude from patients and relatives in palliative care—characteristics and impact: a national survey. <i>BMJ Supportive &amp; Palliative Care</i> . 10.1136/bmjspcare-2019-001858                                                                                                                                                                                                        | 2019 | Spain            | Quantitative (Survey)                                       | Observational | Palliative care units<br>Community                                                          | 186 |
| 7  | Ashley, C., et al. (2021). The psychological well-being of primary healthcare nurses during COVID-19: a qualitative study. <i>Journal of Advanced Nursing</i> , 77(9), 3820-3828. <a href="https://doi.org/10.1111/jan.14937">https://doi.org/10.1111/jan.14937</a>                                                                                                                                                     | 2021 | Australia        | Qualitative (Interviews)                                    | Observational | GPs<br>Community                                                                            | 25  |
| 8  | Bakker, D., et al. (2010). Canadian cancer nurses' views on recruitment and retention. <i>Journal of Nursing Management</i> , 18(2), 205-214. <a href="https://doi.org/10.1111/j.1365-2834.2009.01029.x">https://doi.org/10.1111/j.1365-2834.2009.01029.x</a>                                                                                                                                                           | 2010 | Canada           | Qualitative (Focus groups)                                  | Observational | Oncology<br>Ambulatory care<br>Hospitals<br>Community                                       | 91  |
| 9  | Barnes, A. L. (2015). Relationship between job satisfaction among frontline staff and patient satisfaction: Evidence from community health centers in South Carolina (Doctoral dissertation, University of South Carolina). <a href="https://www.proquest.com/docview/1765406972?pq-origsite=gscholar&amp;fromopenview=true">https://www.proquest.com/docview/1765406972?pq-origsite=gscholar&amp;fromopenview=true</a> | 2015 | USA              | Quantitative (Survey)                                       | Observational | Community                                                                                   | 303 |
| 10 | Beate, A., & Jacobsen, F. F. (2020). The art of caring in selected Norwegian nursing homes: a qualitative approach. <i>International Journal of Caring Sciences</i> , 13(2), 820. <a href="https://hdl.handle.net/11250/2738332">https://hdl.handle.net/11250/2738332</a>                                                                                                                                               | 2020 | Norway           | Qualitative (Interviews)                                    | Observational | Nursing homes                                                                               | 11  |
| 11 | Bhatnagar, A. (2014). Determinants of motivation and job satisfaction among primary health workers: case studies from Nigeria and India (Doctoral dissertation, Johns Hopkins University). <a href="http://jhir.library.jhu.edu/handle/1774.2/37851">http://jhir.library.jhu.edu/handle/1774.2/37851</a>                                                                                                                | 2014 | Nigeria<br>India | Mixed (Interviews<br>Survey)                                | Observational | Primary health care                                                                         | 29  |
| 12 | Bhatnagar, A., et al. (2017). Primary health care workers' views of motivating factors at individual, community and organizational levels: a qualitative study from Nasarawa and Ondo states, Nigeria. <i>The International Journal of Health Planning and Management</i> , 32(2), 217-233. <a href="https://doi.org/10.1002/hpm.2342">https://doi.org/10.1002/hpm.2342</a>                                             | 2017 | Nigeria          | Qualitative (Interviews)                                    | Observational | Community                                                                                   | 29  |
| 13 | Blank, F. S., et al. (2014). A comparison of patient and nurse expectations regarding nursing care in the emergency department. <i>Journal of Emergency Nursing</i> , 40(4), 317-322. <a href="https://doi.org/10.1016/j.jen.2013.02.010">https://doi.org/10.1016/j.jen.2013.02.010</a>                                                                                                                                 | 2014 | N/A              | Mixed (Survey)                                              | Observational | Emergency department                                                                        | 100 |
| 14 | Cameron, P. J., et al. (2010). Physician retention in rural Alberta: key community factors. <i>Canadian Journal of Public Health</i> , 101(1), 79-82. <a href="https://doi.org/10.1007/BF03405568">https://doi.org/10.1007/BF03405568</a>                                                                                                                                                                               | 2010 | Canada           | Qualitative (Interviews<br>Document review<br>Observations) | Observational | Community                                                                                   | 15  |
| 15 | Chou, W. C., et al. (2006). Perceptions of physicians on the barriers and facilitators to integrating fall risk evaluation and management into practice. <i>Journal of General Internal Medicine</i> , 21(2), 117-122. <a href="https://doi.org/10.1007/s11606-006-0244-3">https://doi.org/10.1007/s11606-006-0244-3</a>                                                                                                | 2006 | USA              | Qualitative (Interviews)                                    | Observational | Primary care offices                                                                        | 18  |
| 16 | Christiansen, B. (2008). Good work—how is it recognised by the nurse? <i>Journal of Clinical Nursing</i> , 17(12), 1645-1651. <a href="https://doi.org/10.1111/j.1365-2702.2007.02139.x">https://doi.org/10.1111/j.1365-2702.2007.02139.x</a>                                                                                                                                                                           | 2008 | Norway           | Qualitative (Interviews)                                    | Observational | Hospitals<br>Clinic                                                                         | 10  |
| 17 | Ciocănel, A., et al. (2018). Helping, mediating, and gaining recognition: the everyday identity work of Romanian health social workers. <i>Social Work in Health Care</i> , 57(3), 206-219. <a href="https://doi.org/10.1080/00981389.2018.1426674">https://doi.org/10.1080/00981389.2018.1426674</a>                                                                                                                   | 2018 | Romania          | Qualitative (Interviews)                                    | Observational | Hospitals<br>Emergency department<br>Maternity unit<br>School-based<br>Community<br>Hospice | 21  |
| 18 | Cleary, M., et al. Mental health nurses' perceptions of good work in an acute setting. <i>International Journal of Mental Health Nursing</i> , 21(5), 471-479. <a href="https://doi.org/10.1111/j.1447-0349.2011.00810.x">https://doi.org/10.1111/j.1447-0349.2011.00810.x</a>                                                                                                                                          | 2012 | Australia        | Qualitative (Interviews)                                    | Observational | Mental health centres                                                                       | 40  |

|    |                                                                                                                                                                                                                                                                                                                        |      |                                         |                                               |               |                                                                                                  |     |
|----|------------------------------------------------------------------------------------------------------------------------------------------------------------------------------------------------------------------------------------------------------------------------------------------------------------------------|------|-----------------------------------------|-----------------------------------------------|---------------|--------------------------------------------------------------------------------------------------|-----|
| 19 | Converso, D., et al. (2015). Do positive relations with patients play a protective role for healthcare employees? Effects of patients' gratitude and support on nurses' burnout. <i>Frontiers in Psychology</i> , 6, 470. <a href="https://doi.org/10.3389/fpsyg.2015.00470">10.3389/fpsyg.2015.00470</a>              | 2015 | Italy                                   | Quantitative (Questionnaire)                  | Observational | Hospitals<br>Emergency department<br>Oncology                                                    | 204 |
| 20 | Cortese, C. G. (2007). Job satisfaction of Italian nurses: an exploratory study. <i>Journal of Nursing Management</i> , 15(3), 303-312. <a href="https://doi.org/10.1111/j.1365-2834.2007.00694.x">https://doi.org/10.1111/j.1365-2834.2007.00694.x</a>                                                                | 2007 | Italy                                   | Qualitative (Interviews)                      | Observational | Hospitals                                                                                        | 64  |
| 21 | Dageid, W., et al. (2016). Sustaining motivation among community health workers in aids care in Kwazulu-natal, South Africa: challenges and prospects. <i>Journal of Community Psychology</i> , 44(5), 569-585. <a href="https://doi.org/10.1002/jcop.21787">https://doi.org/10.1002/jcop.21787</a>                    | 2016 | South Africa                            | Qualitative (Interviews)                      | Observational | Community                                                                                        | 12  |
| 22 | Danet, A. D., et al. (2020). Emotional paths of professional experiences in transplant coordinators. <i>Nefrología (English Edition)</i> , 40(1), 75-90. <a href="https://doi.org/10.1016/j.nefro.2019.05.005">https://doi.org/10.1016/j.nefro.2019.05.005</a>                                                         | 2020 | Spain                                   | Qualitative (Questionnaire Interviews)        | Observational | Hospitals<br>Transplant coordination                                                             | 22  |
| 23 | Datiko, D. G., et al. (2015). Exploring providers' perspectives of a community based TB approach in Southern Ethiopia: implication for community based approaches. <i>BMC Health Services Research</i> , 15(1), 1-9. <a href="https://doi.org/10.1186/s12913-015-1149-9">https://doi.org/10.1186/s12913-015-1149-9</a> | 2015 | Ethiopia                                | Qualitative (Interviews)                      | Observational | Community                                                                                        | 37  |
| 24 | de Oliveira, A. R., et al. (2019). Satisfaction and limitation of primary health care nurses' work in rural areas. <i>Rural and Remote Health</i> , 19(2), 55-64. <a href="https://search.informit.org/doi/10.3316/informit.143753391883465">https://search.informit.org/doi/10.3316/informit.143753391883465</a>      | 2019 | Brazil                                  | Qualitative (Interviews)                      | Observational | Family health units                                                                              | 11  |
| 25 | Fereday, J., & Muir-Cochrane, E. (2006). The role of performance feedback in the self-assessment of competence: a research study with nursing clinicians. <i>Collegian</i> , 13(1), 10-15. <a href="https://doi.org/10.1016/S1322-7696(08)60511-9">https://doi.org/10.1016/S1322-7696(08)60511-9</a>                   | 2006 | Australia                               | Qualitative (Focus groups)                    | Observational | Hospitals<br>Midwifery<br>General surgical<br>General medical                                    | 26  |
| 26 | Fontanini, R., et al. (2021). Italian nurses' experiences during the COVID-19 pandemic: a qualitative analysis of internet posts. <i>International Nursing Review</i> , 68(2), 238-247. <a href="https://doi.org/10.1111/inr.12669">https://doi.org/10.1111/inr.12669</a>                                              | 2021 | Italy                                   | Qualitative (Descriptive study)               | Observational | Hospitals<br>Community                                                                           | 380 |
| 27 | Fort, A. L., & Voltero, L. (2004). Factors affecting the performance of maternal health care providers in Armenia. <i>Human Resources for Health</i> , 2(1), 1-11. <a href="https://doi.org/10.1186/1478-4491-2-8">https://doi.org/10.1186/1478-4491-2-8</a>                                                           | 2004 | Armenia                                 | Quantitative (Interviews Survey Observations) | Observational | Reproductive health services                                                                     | 285 |
| 28 | Johansson, M., et al. (2019). Nursing staff's experiences of intensive care unit diaries: a qualitative study. <i>Nursing in Critical Care</i> , 24(6), 407-413. <a href="https://doi.org/10.1111/nicc.12416">https://doi.org/10.1111/nicc.12416</a>                                                                   | 2019 | Sweden                                  | Qualitative (Focus groups)                    | Observational | University Hospitals<br>ICU                                                                      | 27  |
| 29 | Judd, M. J., et al. (2017). Workplace stress, burnout and coping: a qualitative study of the experiences of Australian disability support workers. <i>Health &amp; Social Care in the Community</i> , 25(3), 1109-1117. <a href="https://doi.org/10.1111/hsc.12409">https://doi.org/10.1111/hsc.12409</a>              | 2017 | Australia                               | Qualitative (Interviews)                      | Observational | Disability Services                                                                              | 12  |
| 30 | Kelly, D., et al. (2020). The experiences of cancer nurses working in four European countries: a qualitative study. <i>European Journal of Oncology Nursing</i> , 49, 101844. <a href="https://doi.org/10.1016/j.ejon.2020.101844">https://doi.org/10.1016/j.ejon.2020.101844</a>                                      | 2020 | Estonia<br>Germany<br>Netherlands<br>UK | Qualitative (Interviews Focus groups)         | Observational | Oncology                                                                                         | 97  |
| 31 | Khowaja, K., et al. (2005). Registered nurses perception of work satisfaction at a Tertiary Care University Hospital. <i>Journal of Nursing Management</i> , 13(1), 32-39. <a href="https://doi.org/10.1111/j.1365-2834.2004.00507.x">https://doi.org/10.1111/j.1365-2834.2004.00507.x</a>                             | 2005 | Pakistan                                | Qualitative (Interviews Focus groups)         | Observational | Hospitals<br>Critical care<br>Medical-surgery<br>Ambulatory<br>Maternity<br>Emergency department | 45  |
| 32 | Kim, Y. M., et al. (2008). Factors that enable nurse-patient communication in a family planning context: a positive deviance study. <i>International Journal of Nursing Studies</i> , 45(10), 1411-1421. <a href="https://doi.org/10.1016/j.ijnurstu.2008.01.002">https://doi.org/10.1016/j.ijnurstu.2008.01.002</a>   | 2008 | Indonesia                               | Qualitative (Interviews Focus groups)         | Observational | Clinic                                                                                           | 34  |



|    |                                                                                                                                                                                                                                                                                                                                                                                               |      |                                   |                                          |               |                                                                       |     |
|----|-----------------------------------------------------------------------------------------------------------------------------------------------------------------------------------------------------------------------------------------------------------------------------------------------------------------------------------------------------------------------------------------------|------|-----------------------------------|------------------------------------------|---------------|-----------------------------------------------------------------------|-----|
| 33 | MacLeod, M. L., et al. (2021). The meaning of nursing practice for nurses who are retired yet continue to work in a rural or remote community. <i>BMC Nursing</i> , 20(1), 1-13. <a href="https://doi.org/10.1186/s12912-021-00721-0">https://doi.org/10.1186/s12912-021-00721-0</a>                                                                                                          | 2021 | Canada                            | Qualitative (Survey)                     | Observational | N/A                                                                   | 101 |
| 34 | Maharani, C., et al. (2022). The National Health Insurance System of Indonesia and primary care physicians' job satisfaction: a prospective qualitative study. <i>Family Practice</i> , 39(1), 112-124. <a href="https://doi.org/10.1093/fampra/cmab067">https://doi.org/10.1093/fampra/cmab067</a>                                                                                           | 2022 | Indonesia                         | Qualitative (Interviews)                 | Observational | Primary health care                                                   | 34  |
| 35 | Martínez-Taboas, A., et al. (2014). Gifts in psychotherapy: attitudes and experiences of Puerto Rican psychotherapists. <i>Revista Puertorriqueña de Psicología</i> , 25(2), 328-339. <a href="https://www.redalyc.org/articulo.oa?id=233245622011">https://www.redalyc.org/articulo.oa?id=233245622011</a>                                                                                   | 2014 | Puerto Rico                       | Quantitative (Questionnaire)             | Observational | Private practice<br>Hospitals<br>University                           | 75  |
| 36 | Minooee, S., et al. (2021). Catastrophic thinking: is it the legacy of traumatic births? Midwives' experiences of shoulder dystocia complicated births. <i>Women and Birth</i> , 34(1), e38-e46. <a href="https://doi.org/10.1016/j.wombi.2020.08.008">https://doi.org/10.1016/j.wombi.2020.08.008</a>                                                                                        | 2021 | Australia                         | Qualitative (Interviews)                 | Observational | Hospitals                                                             | 25  |
| 37 | Muntz, J., & Dormann, C. (2020). Moderating effects of appreciation on relationships between illegitimate tasks and intrinsic motivation: a two-wave shortitudinal study. <i>European Journal of Work and Organizational Psychology</i> , 29(3), 391-404. <a href="https://doi.org/10.1080/1359432X.2019.1706489">https://doi.org/10.1080/1359432X.2019.1706489</a>                           | 2020 | Germany                           | Quantitative (Panel study)               | Observational | Hospitals                                                             | 241 |
| 38 | Nwala, E. (2015). The impact of nonmonetary job benefits on job retention in rural healthcare (Doctoral dissertation, Capella University). <a href="https://www.proquest.com/docview/1735405605?pq-origsite=gscholar&amp;fromopenview=true">https://www.proquest.com/docview/1735405605?pq-origsite=gscholar&amp;fromopenview=true</a>                                                        | 2015 | USA                               | Qualitative (Interviews Observations)    | Observational | Clinic                                                                | 13  |
| 39 | Oluwole, A., et al. (2019). Optimising the performance of frontline implementers engaged in the NTD programme in Nigeria: lessons for strengthening community health systems for universal health coverage. <i>Human Resources for Health</i> , 17(1), 1-16. <a href="https://doi.org/10.1186/s12960-019-0419-8">https://doi.org/10.1186/s12960-019-0419-8</a>                                | 2019 | Nigeria                           | Qualitative (Workshops)                  | Observational | Community                                                             | N/A |
| 40 | Ortiz, J. A. (2014). New graduate nurses' experiences of what accounts for their lack of professional confidence during their first year of practice (Doctoral dissertation, Capella University). <a href="https://www.proquest.com/docview/1650654883?pq-origsite=gscholar&amp;fromopenview=true">https://www.proquest.com/docview/1650654883?pq-origsite=gscholar&amp;fromopenview=true</a> | 2014 | USA                               | Qualitative (Interviews)                 | Observational | Hospitals                                                             | 12  |
| 41 | Pal, L. M., et al. (2014). Utilising feedback from patients and their families as a learning strategy in a foundation degree in palliative and supportive care: a qualitative study. <i>Nurse Education Today</i> , 34(3), 319-324. <a href="https://doi.org/10.1016/j.nedt.2013.06.012">https://doi.org/10.1016/j.nedt.2013.06.012</a>                                                       | 2014 | UK                                | Qualitative (Focus groups Questionnaire) | Observational | Nursing homes<br>Hospitals<br>Hospices<br>Oncology wards<br>Community | 12  |
| 42 | Pariseault, C. A., et al. (2022). Nurses' experiences of caring for patients and families during the Covid-19 pandemic: communication challenges. <i>American Journal of Nursing</i> , 122, 22-30. <a href="https://doi.org/10.1097/01.NAJ.0000805644.85184.d2">10.1097/01.NAJ.0000805644.85184.d2</a>                                                                                        | 2022 | USA                               | Qualitative (Descriptive study)          | Observational | Hospitals                                                             | 17  |
| 43 | Peteet, J. R., et al. (1992). Relationships with patients in oncology: can a clinician be a friend? <i>Psychiatry</i> , 55(3), 223-229. <a href="https://doi.org/10.1080/00332747.1992.11024596">https://doi.org/10.1080/00332747.1992.11024596</a>                                                                                                                                           | 1992 | USA                               | Mixed (Interviews)                       | Observational | Oncology                                                              | 192 |
| 44 | Pooley, H. M., et al. (2015). The experience of the long-term doctor-patient relationship in consultant nephrologists. <i>Journal of Renal Care</i> , 41(2), 88-95. <a href="https://doi.org/10.1111/jorc.12092">https://doi.org/10.1111/jorc.12092</a>                                                                                                                                       | 2015 | UK                                | Qualitative (Interviews)                 | Observational | Renal department                                                      | 7   |
| 45 | Prytherch, H., et al. (2012). Maternal and newborn healthcare providers in rural Tanzania: in-depth interviews exploring influences on motivation, performance and job satisfaction. <i>Rural and Remote Health</i> , 12(3), 1-15. <a href="https://search.informit.org/doi/10.3316/informit.625974688045681">https://search.informit.org/doi/10.3316/informit.625974688045681</a>            | 2012 | Tanzania                          | Qualitative (Interviews)                 | Observational | Health centres                                                        | 35  |
| 46 | Prytherch, H., et al. (2013). Motivation and incentives of rural maternal and neonatal health care providers: a comparison of qualitative findings from Burkina Faso, Ghana and Tanzania. <i>BMC Health Services Research</i> , 13(1), 1-15. <a href="https://doi.org/10.1186/1472-6963-13-149">https://doi.org/10.1186/1472-6963-13-149</a>                                                  | 2013 | Burkina Faso<br>Ghana<br>Tanzania | Qualitative (Interviews)                 | Observational | Health centres                                                        | 35  |

|    |                                                                                                                                                                                                                                                                                                                                                                                                     |      |                    |                                           |                |                                                         |      |
|----|-----------------------------------------------------------------------------------------------------------------------------------------------------------------------------------------------------------------------------------------------------------------------------------------------------------------------------------------------------------------------------------------------------|------|--------------------|-------------------------------------------|----------------|---------------------------------------------------------|------|
| 47 | Raingruber, B., & Wolf, T. (2015). Nurse perspectives regarding the meaningfulness of oncology nursing practice. <i>Clinical Journal of Oncology Nursing</i> , 19(3), 292-296. <a href="https://doi.org/10.1188/15.CJON.292-296">10.1188/15.CJON.292-296</a>                                                                                                                                        | 2015 | USA                | Qualitative (Interviews)                  | Observational  | Oncology wards<br>Medical-surgical unit                 | 8    |
| 48 | Reis, M. J. D., et al. (2010). Experiences of nurses in health care for female victims of sexual violence. <i>Revista de Saude Publica</i> , 44, 325-331. <a href="https://doi.org/10.1590/S0034-89102010000200013">https://doi.org/10.1590/S0034-89102010000200013</a>                                                                                                                             | 2010 | Brazil             | Qualitative (Interviews)                  | Observational  | Sexual violence service                                 | 6    |
| 49 | Riskin, A., et al. (2019). Expressions of gratitude and medical team performance. <i>Pediatrics</i> , 143(4). <a href="https://doi.org/10.1542/peds.2018-2043">https://doi.org/10.1542/peds.2018-2043</a>                                                                                                                                                                                           | 2019 | Israel             | Quantitative (Randomised study)           | Interventional | Hospitals<br>NICU                                       | 172  |
| 50 | Robinson, D. (2019). Exploring experiences of burnout, engagement, and social support networks: a qualitative study of hospital medicine physicians (Doctoral dissertation, Colorado State University). <a href="https://www.proquest.com/docview/2244361153?pq-origsite=gscholar&amp;fromopenview=true">https://www.proquest.com/docview/2244361153?pq-origsite=gscholar&amp;fromopenview=true</a> | 2019 | USA                | Mixed (Interviews Survey)                 | Observational  | Hospitals                                               | 15   |
| 51 | Roca, J., et al. (2021). Experiences, emotional responses, and coping skills of nursing students as auxiliary health workers during the peak Covid-19 pandemic: a qualitative study. <i>International Journal of Mental Health Nursing</i> , 30(5), 1080-1092. <a href="https://doi.org/10.1111/inm.12858">https://doi.org/10.1111/inm.12858</a>                                                    | 2021 | Spain              | Qualitative (Interviews)                  | Observational  | Nursing homes<br>Hospitals<br>COVID-19 specialized unit | 22   |
| 52 | Ronnie, L. (2019). Intensive care nurses in South Africa: expectations and experiences in a public sector hospital. <i>Journal of Nursing Management</i> , 27(7), 1431-1437. <a href="https://doi.org/10.1111/jonm.12826">https://doi.org/10.1111/jonm.12826</a>                                                                                                                                    | 2019 | South Africa       | Qualitative (Interviews)                  | Observational  | Hospitals<br>ICU                                        | 44   |
| 53 | Sakai, M., et al. (2013). Home visiting nurses' attitudes toward caring for dying patients, and related workplace factors. <i>International Journal of Palliative Nursing</i> , 19(4), 195-204. <a href="https://doi.org/10.12968/ijpn.2013.19.4.195">https://doi.org/10.12968/ijpn.2013.19.4.195</a>                                                                                               | 2013 | Japan              | Quantitative (Questionnaire)              | Observational  | Community                                               | 206  |
| 54 | Seitovirta, J., et al. (2015). Registered nurses' experiences of rewarding in a Finnish university hospital—an interview study. <i>Journal of Nursing Management</i> , 23(7), 868-878. <a href="https://doi.org/10.1111/jonm.12228">https://doi.org/10.1111/jonm.12228</a>                                                                                                                          | 2015 | Finland            | Qualitative (Interviews)                  | Observational  | Hospitals                                               | 10   |
| 55 | Seitovirta, J., et al. (2017). Attention to nurses' rewarding—an interview study of registered nurses working in primary and private healthcare in Finland. <i>Journal of Clinical Nursing</i> , 26(7-8), 1042-1052. <a href="https://doi.org/10.1111/jocn.13459">https://doi.org/10.1111/jocn.13459</a>                                                                                            | 2017 | Finland            | Qualitative (Interviews)                  | Observational  | Healthcare organisations                                | 20   |
| 56 | Smallwood, N., et al. (2021). Moral distress and perceived community views are associated with mental health symptoms in frontline health workers during the COVID-19 pandemic. <i>International Journal of Environmental Research and Public Health</i> , 18(16), 8723. <a href="https://doi.org/10.3390/ijerph18168723">https://doi.org/10.3390/ijerph18168723</a>                                | 2021 | Australia          | Quantitative (Survey)                     | Observational  | Hospitals                                               | 7846 |
| 57 | Tang, P. M., et al. (2021). How and when service beneficiaries' gratitude enriches employees' daily lives. <i>Journal of Applied Psychology</i> , 107(6), 987-1008. <a href="https://doi.org/10.1037/apl0000975">https://doi.org/10.1037/apl0000975</a>                                                                                                                                             | 2021 | China<br>Singapore | Quantitative (Experience Sampling Method) | Observational  | Hospitals                                               | 275  |
| 58 | Vachon, M., & Guité-Verret, A. (2020). From powerlessness to recognition the meaning of palliative care clinicians' experience of suffering. <i>International Journal of Qualitative Studies on Health and Well-being</i> , 15(1), 1852362. <a href="https://doi.org/10.1080/17482631.2020.1852362">https://doi.org/10.1080/17482631.2020.1852362</a>                                               | 2020 | Canada             | Qualitative (Interviews)                  | Observational  | Medical centre                                          | 21   |
| 59 | Vail, L., et al. (2011). Healthcare assistants in general practice: a qualitative study of their experiences. <i>Primary Health Care Research &amp; Development</i> , 12(1), 29-41. <a href="https://doi.org/10.1017/S1463423610000204">https://doi.org/10.1017/S1463423610000204</a>                                                                                                               | 2011 | UK                 | Qualitative (Interviews)                  | Observational  | GP                                                      | 14   |
| 60 | Vandecasteele, T., et al. (2015). Nurses' perceptions of transgressive behaviour in care relationships: a qualitative study. <i>Journal of Advanced Nursing</i> , 71(12), 2786-2798. <a href="https://doi.org/10.1111/jan.12749">https://doi.org/10.1111/jan.12749</a>                                                                                                                              | 2015 | Belgium            | Qualitative (Interviews)                  | Observational  | Hospitals                                               | 18   |
| 61 | Wahlberg, A. C., & Bjorkman, A. (2018). Expert in nursing care but sometimes disrespected—telenurses' reflections on their work environment and nursing care. <i>Journal of Clinical Nursing</i> , 27(21-22), 4203-4211. <a href="https://doi.org/10.1111/jocn.14622">https://doi.org/10.1111/jocn.14622</a>                                                                                        | 2018 | Sweden             | Qualitative (Interviews)                  | Observational  | Telephone service                                       | 24   |

|    |                                                                                                                                                                                                                                                                                                                                                                                                                                                                                                                                                                     |              |           |                                        |                |                                 |     |
|----|---------------------------------------------------------------------------------------------------------------------------------------------------------------------------------------------------------------------------------------------------------------------------------------------------------------------------------------------------------------------------------------------------------------------------------------------------------------------------------------------------------------------------------------------------------------------|--------------|-----------|----------------------------------------|----------------|---------------------------------|-----|
| 62 | Waltz, L. A., et al. (2020). Exploring job satisfaction and workplace engagement in millennial nurses. <i>Journal of Nursing Management</i> , 28(3), 673-681. <a href="https://doi.org/10.1111/jonm.12981">https://doi.org/10.1111/jonm.12981</a>                                                                                                                                                                                                                                                                                                                   | 2020         | USA       | Qualitative (Focus groups)             | Observational  | Hospitals                       | 33  |
| 63 | Warburton, J., et al. (2014). Extrinsic and intrinsic factors impacting on the retention of older rural healthcare workers in the north Victorian public sector: a qualitative study. <i>Rural and Remote Health</i> , 14(3), 131-146. <a href="https://search.informit.org/doi/10.3316/informit.451178784672507">https://search.informit.org/doi/10.3316/informit.451178784672507</a>                                                                                                                                                                              | 2014         | Australia | Qualitative (Interviews)               | Observational  | N/A                             | 17  |
| 64 | Wasko, K. (2014). Medical practice in rural Saskatchewan: factors in physician recruitment and retention. <i>Canadian Journal of Rural Medicine</i> , 19(3), 93. <a href="https://srpc.ca/resources/Documents/CJRM/vol19n3/pg93.pdf">https://srpc.ca/resources/Documents/CJRM/vol19n3/pg93.pdf</a>                                                                                                                                                                                                                                                                  | 2014         | Canada    | Qualitative (Interviews)               | Observational  | Community                       | 62  |
| 65 | Weaver, S. H., et al. (2020). The impact of real-time patient feedback using a gamified system. <i>Nursing Management</i> , 51(12), 14-21. 10.1097/01.NUMA.0000721812.13386.81                                                                                                                                                                                                                                                                                                                                                                                      | 2020         | USA       | Mixed (Interviews Focus groups Survey) | Interventional | Hospitals Medical-surgical unit | 22  |
| 66 | Wright, S. M., et al. (2013). Ethical concerns related to grateful patient philanthropy: the physician's perspective. <i>Journal of General Internal Medicine</i> , 28(5), 645-651. <a href="https://doi.org/10.1007/s11606-012-2246-7">https://doi.org/10.1007/s11606-012-2246-7</a>                                                                                                                                                                                                                                                                               | 2013         | USA       | Qualitative (Interviews)               | Observational  | University                      | 20  |
| 67 | Zulu, J. M., et al. (2015). 1/3. Hope and despair: the community health assistant role in Zambia. <i>British Journal of Healthcare Assistants</i> , 9(9), 458-465. <a href="https://doi.org/10.12968/bjha.2015.9.9.458">https://doi.org/10.12968/bjha.2015.9.9.458</a><br>Zulu, J. M., et al. (2016). Hope and despair 3/3: pluses and minuses for community health assistants in rural Zambia. <i>British Journal of Healthcare Assistants</i> , 10(1), 31-35. <a href="https://doi.org/10.12968/bjha.2016.10.1.31">https://doi.org/10.12968/bjha.2016.10.1.31</a> | 2015<br>2016 | Zambia    | Qualitative (Interviews)               | Observational  | Community                       | 12  |
| 68 | Zwack, J., & Schweitzer, J. (2013). If every fifth physician is affected by burnout, what about the other four? Resilience strategies of experienced physicians. <i>Academic Medicine</i> , 88(3), 382-389. 10.1097/ACM.0b013e318281696b                                                                                                                                                                                                                                                                                                                            | 2013         | Germany   | Qualitative (Interviews)               | Observational  | Hospitals                       | 200 |

365

366 Research was located in 32 countries across six continents (Table 2). Two studies were located in multiple

367 countries (50, 51). One study did not state the study location (52).

368 **Table 2 – Research location of included studies in order of quantity**

369 Multiple papers from the same study counted as having a single location unless reporting results from  
370 different locations.

| Continent     | Quantity | Country      | Quantity | Study ID(s)                               |
|---------------|----------|--------------|----------|-------------------------------------------|
| Europe        | 23       | UK           | 4        | 30, 41, 44, 59                            |
|               |          | Germany      | 3        | 30, 37, 68                                |
|               |          | Italy        | 3        | 19, 20, 26                                |
|               |          | Spain        | 3        | 6, 22, 51                                 |
|               |          | Finland      | 2        | 54, 55                                    |
|               |          | Norway       | 2        | 10, 16                                    |
|               |          | Sweden       | 2        | 28, 61                                    |
|               |          | Belgium      | 1        | 60                                        |
|               |          | Estonia      | 1        | 30                                        |
|               |          | Netherlands  | 1        | 30                                        |
|               |          | Romania      | 1        | 17                                        |
| North America | 16       | USA          | 11       | 9, 15, 38, 40, 42, 43, 47, 50, 62, 65, 66 |
|               |          | Canada       | 5        | 8, 14, 33, 58, 64                         |
| Africa        | 12       | South Africa | 4        | 1, 2, 21, 52                              |
|               |          | Nigeria      | 2        | 11, 39                                    |
|               |          | Burkina Faso | 1        | 46                                        |
|               |          | Ethiopia     | 1        | 23                                        |
|               |          | Ghana        | 1        | 46                                        |
|               |          | Tanzania     | 1        | 46                                        |
| Uganda        | 1        | 5            |          |                                           |

|               |   |             |   |                           |
|---------------|---|-------------|---|---------------------------|
|               |   | Zambia      | 1 | 67                        |
| Asia          | 9 | Indonesia   | 2 | 32, 34                    |
|               |   | Armenia     | 1 | 27                        |
|               |   | Bangladesh  | 1 | 4                         |
|               |   | China       | 1 | 57                        |
|               |   | Israel      | 1 | 49                        |
|               |   | Japan       | 1 | 53                        |
|               |   | Pakistan    | 1 | 31                        |
|               |   | Singapore   | 1 | 57                        |
| Australasia   | 7 | Australia   | 7 | 7, 18, 25, 29, 36, 56, 63 |
| South America | 3 | Brazil      | 2 | 24, 48                    |
|               |   | Puerto Rico | 1 | 35                        |

371

372 The median year of publication was 2015 (Table 3).

373 **Table 3** – *Year of publication for included papers in chronological order with corresponding study IDs*

374 Multiple papers from the same study were included separately due to differing publication dates

| Year | Quantity | Study ID(s)                   |
|------|----------|-------------------------------|
| 1992 | 1        | 43                            |
| 2004 | 1        | 27                            |
| 2005 | 1        | 31                            |
| 2006 | 2        | 15, 25                        |
| 2007 | 1        | 20                            |
| 2008 | 2        | 16, 32                        |
| 2010 | 4        | 1, 8, 14, 48                  |
| 2011 | 1        | 59                            |
| 2012 | 3        | 4, 18, 45                     |
| 2013 | 5        | 8, 11, 32, 34, 45             |
| 2014 | 8        | 3, 11, 13, 35, 40, 41, 63, 64 |
| 2015 | 8        | 9, 19, 23, 38, 44, 47, 54, 60 |
| 2016 | 3        | 2, 21, 67                     |
| 2017 | 3        | 12, 29, 5                     |
| 2018 | 2        | 17, 61                        |
| 2019 | 7        | 6, 24, 28, 39, 49, 50, 52     |
| 2020 | 7        | 10, 22, 30, 37, 58, 62, 65    |
| 2021 | 7        | 7, 26, 33, 36, 51, 56, 57     |
| 2022 | 2        | 34, 42                        |

375 Most studies were qualitative, and all but two studies were observational, in that they presented evidence

376 relating to existing uses of positive feedback (Table 4).

377 **Table 4** – *Methods of included papers, in order of quantity*

378 Multiple papers from the same study were counted as having a single study methods. Three companion papers  
379 were not counted in the ‘total quantity’ column.

380 Many papers used multiple methods, each counted separately in the ‘quantity’ column.

| Type of study | Total quantity | Method               | Quantity |
|---------------|----------------|----------------------|----------|
| Qualitative   | 49             | Interviews           | 40       |
|               |                | Focus groups         | 8        |
|               |                | Questionnaire/survey | 4        |
|               |                | Observations         | 2        |
|               |                | Descriptive study    | 2        |
|               |                | Workshops            | 1        |

|              |    |                            |   |
|--------------|----|----------------------------|---|
| Quantitative | 10 | Questionnaire/survey       | 6 |
|              |    | Experience Sampling Method | 1 |
|              |    | Observations               | 1 |
|              |    | Panel study                | 1 |
|              |    | Randomised study           | 1 |
| Mixed        | 6  | Interviews                 | 5 |
|              |    | Questionnaire/survey       | 5 |
|              |    | Focus groups               | 3 |

381

382 The two intervention studies were as follows:

383 *Riskin et al, 2019 [ID 49]*

384 This study used pre-recorded video to simulate the impact on Neonatal Intensive Care Unit (NICU) team  
385 performance of gratitude expressed by two different sources. NICU teams (n = 43) were randomly assigned to  
386 1 of 4 conditions: (1) maternal gratitude (2) physician-expressed gratitude (3) combined maternal and  
387 physician gratitude, or (4) control (same agents communicated neutral statements). Subsequent team  
388 performance in a training workshop was evaluated by a blinded panel, on a five-point Likert scale. Maternal  
389 gratitude produced a significant positive affect on team performance ( $3.9 \pm 0.9$  vs  $3.6 \pm 1.0$ ;  $P = .04$ ). Most of  
390 this effect was explained by the positive impact of gratitude on team information sharing ( $4.3 \pm 0.8$  vs  $4.0 \pm$   
391  $0.8$ ;  $P = .03$ ). As a result, accuracy of diagnostic work was improved (95% CI = 0.018 to 0.395;  $P = .03$ )

392 *Weaver, 2020 [ID 65]*

393 This study evaluated the impact of using a gamified feedback system on a medical-surgical unit in the US. The  
394 feedback system allowed service users to use a tablet to input free-text comments, which were later sent as  
395 text alerts to nurses and technicians. Its impact was evaluated using interviews, focus groups, and surveys.  
396 Healthcare staff described that receiving recognition and appreciation through the feedback system made  
397 them feel good, boosted confidence, morale and motivation, and helped them to feel comfortable in their job.  
398 Staff were initially enthusiastic about using the feedback system, which was seen to support the effect of  
399 positive feedback. Similarly, when staff became less enthusiastic and motivated to use the system over time,  
400 this hindered the effects of positive feedback. Night shift staff reported less opportunity to receive feedback  
401 from service users. The system was hindered by the lengthy process of accumulating points and rewards,  
402 making feedback from service users less timely, consistent, or meaningful.

403 **Characteristics of positive feedback in included studies**

404 Positive feedback was described in included studies as having a variety of forms, most commonly described in  
405 their original papers as appreciation and gratitude (Table 5). The form of feedback was categorised as material  
406 or ambiguous. Material feedback referred to physical items given by service users, families, or the community.  
407 In a substantial number of included papers, the precise form of feedback was not explicitly stated, and hence  
408 was ambiguous. For example, gratitude might incorporate a variety of actions, but this was often not stated in  
409 published work.

410 **Table 5 – Positive feedback in included studies in order of quantity**

411 Multiple papers from the same study were counted as having a single type of feedback

| Feedback category | Type of positive feedback | Quantity | Study ID(s)                                                                                               |
|-------------------|---------------------------|----------|-----------------------------------------------------------------------------------------------------------|
| Ambiguous         | Appreciation              | 28       | 1, 2, 7, 8, 9, 11, 14, 19, 21, 24, 26, 29, 32, 33, 34, 36, 37, 43, 45, 47, 49, 51, 53, 54, 56, 61, 64, 68 |
|                   | Gratitude                 | 22       | 6, 10, 13, 14, 20, 21, 23, 24, 32, 33, 35, 42, 43, 46, 48, 52, 53, 57, 59, 60, 61, 62                     |
|                   | Thanks                    | 16       | 5, 6, 14, 18, 30, 33, 35, 36, 40, 46, 47, 50, 54, 55, 65, 66                                              |
|                   | Positive feedback         | 13       | 4, 15, 16, 17, 25, 28, 31, 38, 39, 40, 41, 44, 62                                                         |
|                   | Recognition               | 10       | 1, 11, 24, 27, 32, 43, 50, 55, 60, 68                                                                     |
|                   | Praise                    | 3        | 28, 41, 50                                                                                                |
|                   | Being valued              | 1        | 63                                                                                                        |
|                   | Patient satisfaction      | 1        | 67                                                                                                        |
| Material          | Gifts                     | 7        | 6, 14, 22, 25, 52, 58, 66                                                                                 |
|                   | Cards                     | 5        | 14, 16, 18, 25, 65                                                                                        |
|                   | Flowers                   | 2        | 52, 65                                                                                                    |
|                   | Food                      | 2        | 6, 62                                                                                                     |
|                   | Hugs                      | 1        | 16                                                                                                        |
|                   | Letters                   | 1        | 6                                                                                                         |

412  
413 Included studies identified that positive feedback was delivered by service users (n = 53), the community (n =  
414 18), and families (n = 16), with some studies identifying multiple sources of feedback.

415 Recipients of positive feedback were described using a broad variety of labels, most commonly identified as  
416 clinical staff providing direct care and treatment to service users (n = 68) (Table 6). In some studies, non-  
417 clinical staff received feedback (n = 3).

418 **Table 6 – Feedback recipients of positive feedback in included studies in order of quantity**

419 Multiple papers from the same study were counted as a single feedback recipient

| Recipient category | Feedback recipient | Quantity | Study ID(s)                                                                                                      |
|--------------------|--------------------|----------|------------------------------------------------------------------------------------------------------------------|
| Clinical staff     | Nurses             | 29       | 7, 8, 13, 16, 18, 19, 20, 24, 25, 26, 27, 28, 31, 32, 33, 37, 40, 42, 47, 48, 52, 53, 54, 55, 57, 60, 61, 62, 65 |

|                    |                                   |   |                         |
|--------------------|-----------------------------------|---|-------------------------|
|                    | Community health workers          | 7 | 4, 5, 7, 21, 23, 39, 67 |
|                    | Physicians                        | 6 | 14, 15, 43, 64, 66, 68  |
|                    | Healthcare professionals          | 3 | 6, 22, 34               |
|                    | Clinical staff                    | 2 | 30, 58                  |
|                    | Frontline health workers          | 2 | 9, 56                   |
|                    | Health social workers             | 2 | 17, 43                  |
|                    | Healthcare personnel              | 2 | 10, 38                  |
|                    | Healthcare students               | 2 | 41, 51                  |
|                    | Midwives                          | 2 | 27, 36                  |
|                    | Adult treatment team members      | 1 | 43                      |
|                    | Doctors                           | 1 | 57                      |
|                    | Healthcare assistant              | 1 | 59                      |
|                    | Healthcare providers              | 1 | 45                      |
|                    | Healthcare workers                | 1 | 63                      |
|                    | Hospitalists                      | 1 | 50                      |
|                    | Neonatal Intensive Care Unit team | 1 | 49                      |
|                    | Nephrologists                     | 1 | 44                      |
|                    | Primary health worker             | 1 | 11                      |
|                    | Psychologists                     | 1 | 35                      |
|                    | Volunteer community caregivers    | 1 | 1                       |
|                    | <hr/>                             |   |                         |
| Non-clinical staff | Supervisors                       | 1 | 2                       |
|                    | Technicians                       | 1 | 65                      |
|                    | Disability support worker         | 1 | 29                      |

420

421 Healthcare staff worked in a range of settings, categorised as clinical (primarily provides a health-related  
422 medical function) and non-clinical (primary purpose is not to provide a direct health-related medical function).

423 Most studies considered clinical settings (n = 74) (Table 7). Two included papers did not explicitly state the  
424 setting (53, 54).

425 **Table 7 - Feedback settings of positive feedback delivery in included studies in order of quantity**

426 Multiple papers from the same study were counted separately only if the setting differed between papers

| Setting category | Feedback setting      | Quantity | Study ID(s)                                                                                               |
|------------------|-----------------------|----------|-----------------------------------------------------------------------------------------------------------|
| Clinical setting | Hospitals             | 27       | 8, 16, 17, 19, 20, 22, 25, 26, 28, 31, 35, 36, 37, 40, 41, 42, 49, 50, 51, 52, 54, 56, 57, 60, 62, 65, 68 |
|                  | Oncology              | 6        | 8, 19, 30, 41, 43, 47                                                                                     |
|                  | Emergency department  | 4        | 13, 17, 19, 31                                                                                            |
|                  | Clinics               | 3        | 16, 32, 38                                                                                                |
|                  | General Practice (GP) | 3        | 7, 25, 59                                                                                                 |
|                  | Health centres        | 3        | 18, 45, 58                                                                                                |
|                  | Intensive care        | 3        | 28, 49, 52                                                                                                |
|                  | Maternal care         | 3        | 17, 25, 31                                                                                                |
|                  | Medical surgery       | 3        | 31, 47, 65                                                                                                |
|                  | Nursing homes         | 3        | 10, 41, 51                                                                                                |
|                  | Primary care          | 3        | 11, 15, 34                                                                                                |
|                  | Ambulatory care       | 2        | 8, 31                                                                                                     |
|                  | Hospices              | 2        | 17, 41                                                                                                    |
|                  | Covid-19 unit         | 1        | 51                                                                                                        |
|                  | Critical care         | 1        | 31                                                                                                        |
|                  | Family health units   | 1        | 24                                                                                                        |
|                  | Palliative care       | 1        | 6                                                                                                         |

|                      |                                                                     |    |                                                                    |
|----------------------|---------------------------------------------------------------------|----|--------------------------------------------------------------------|
|                      | Private practice                                                    | 1  | 35                                                                 |
|                      | Renal department                                                    | 1  | 44                                                                 |
|                      | Reproductive health services                                        | 1  | 27                                                                 |
|                      | Sexual violence services                                            | 1  | 48                                                                 |
|                      | Transplant coordination                                             | 1  | 22                                                                 |
| Non-clinical setting | Community (including home-based care and faith-based organisations) | 19 | 1, 2, 4, 5, 6, 7, 8, 9, 12, 14, 17, 21, 23, 26, 39, 41, 53, 64, 67 |
|                      | University                                                          | 3  | 28, 35, 66                                                         |
|                      | Disability services                                                 | 1  | 29                                                                 |
|                      | School-based                                                        | 1  | 17                                                                 |
|                      | Telephone services                                                  | 1  | 61                                                                 |

427

#### 428 Objective 1: Measures of change

429 There was a considerable variation in the outcome domains and measures used in studies (n = 11) (Table 8).

430 The remaining 57 studies did not include a standardised outcome measure. A measure was concluded to be

431 standardised if a citable reference was available.

432 **Table 8 – Outcome domains and outcome measures used in included studies**

| Outcome domain                                | Standardised outcome measure                                                             | Quantity | Study ID(s) |
|-----------------------------------------------|------------------------------------------------------------------------------------------|----------|-------------|
| Attitudes towards caring for dying patients   | Frommelt Attitudes Toward Care of the Dying scale, form B, Japanese version (FATCOD B-J) | 1        | 53          |
| Attitudes towards death                       | The Death Attitude Inventory (DAI)                                                       | 1        | 53          |
| Baseline affective states                     | Short Positive and Negative Affect Schedule (PANAS)                                      | 1        | 57          |
| Beliefs, attitudes, experiences of gifts      | Scale of Attitudes and Behaviors toward Gifts in Psychotherapy (SABGP)                   | 1        | 35          |
| Burnout                                       | Maslach Burnout Inventory                                                                | 2        | 50, 68      |
| Burnout                                       | Maslach Burnout Inventory for Human Service Sector                                       | 1        | 19          |
| Completion of clinical/non-clinical tasks     | MEASURE Evaluation's Quick Investigation of Quality (QIQ) tool                           | 1        | 27          |
| Engagement at work                            | Gallup Worker Engagement Survey                                                          | 2        | 50, 65      |
| Experiences, understandings, meanings         | Nursing Practice in Rural and Remote Canada II (RRNII)                                   | 1        | 33          |
| Illegitimate tasks                            | Bern Illegitimate Tasks Scale                                                            | 1        | 37          |
| Job satisfaction                              | Job Enjoyment Scale                                                                      | 1        | 65          |
| Patient behaviour as a psychological resource | Customer-initiated support scale                                                         | 1        | 19          |
| Patient satisfaction                          | Hospital Consumer Assessment of Health Plans Survey (HCAHPS)                             | 1        | 65          |
| Perception of service user gratitude          | PGRate scale                                                                             | 1        | 19          |
| Psychological demands                         | Job Content Questionnaire (JCQ) subscales                                                | 1        | 19          |
| Resilience                                    | Abbreviated 2 item Connor-Davidson Resilience Scale (CD-RISC 2)                          | 1        | 56          |
| Resilience                                    | Abbreviated Impact of Event Scale (IES-6)                                                | 1        | 56          |
| Resilience                                    | Abbreviated Maslach Burnout Inventory (AMBI)                                             | 1        | 56          |
| Resilience                                    | Patient Health Questionnaire (PHQ-9)                                                     | 1        | 56          |
| Resilience                                    | The Generalised Anxiety Disorder (GAD-7)                                                 | 1        | 56          |



433 **Objective 2: Model development**

434 *Outcomes*

435 All identified outcomes were reported as change for healthcare staff. Three papers reported a change in the  
436 therapeutic staff-service user relationship rather than the healthcare staff individually, listed under the  
437 category most relevant to reported outcomes. Outcomes reporting a change in staff-service user relationships  
438 describe a strengthened therapeutic alliance (55-57). Most papers identified helpful changes to healthcare  
439 staff and services (Table 9).

440 **Table 9 – Helpful outcomes identified in included studies, arranged by higher-level category and sub-category**

441 Multiple papers from the same study were counted separately only if reporting different outcomes. Some  
442 outcomes were described ambiguously in their original papers and therefore included in, but not expanded on,  
443 in the table.

444

| Higher category                                                                             | Outcomes                                  | Study ID(s)                                      |
|---------------------------------------------------------------------------------------------|-------------------------------------------|--------------------------------------------------|
| Short-term emotional change for healthcare workers                                          | Boosted confidence                        | 40, 41, 65                                       |
|                                                                                             | Boosted morale                            | 38, 65                                           |
|                                                                                             | Confirmation of doing good work           | 16, 18, 25, 28, 33, 41, 42, 50, 58, 62           |
|                                                                                             | Coping resource at work                   | 55                                               |
|                                                                                             | Enthusiasm for the job                    | 54                                               |
|                                                                                             | Experience of having a good day           | 50, 60                                           |
|                                                                                             | Feeling comfortable in their job          | 65                                               |
|                                                                                             | Feeling empowered                         | 7                                                |
|                                                                                             | Feeling encouraged                        | 5, 11, 28, 42, 45, 54, 55                        |
|                                                                                             | Feeling engaged                           | 50                                               |
|                                                                                             | Feeling fulfilled                         | 6, 39                                            |
|                                                                                             | Feeling good                              | 38, 40, 41, 48, 51, 65                           |
|                                                                                             | Feeling happy                             | 10, 24, 29, 38, 39, 55                           |
|                                                                                             | Feeling honoured to serve their community | 33                                               |
|                                                                                             | Feeling inspired                          | 1, 54                                            |
|                                                                                             | Feeling positive about work               | 51, 53, 63                                       |
|                                                                                             | Feeling proud of work                     | 2, 6                                             |
|                                                                                             | Feeling rewarded                          | 1, 6, 20, 24, 29, 40, 43, 44, 45, 54, 55, 59, 62 |
|                                                                                             | Feeling successful                        | 10                                               |
|                                                                                             | Feeling supported                         | 7                                                |
| Feeling valued                                                                              | 2, 7, 36, 55, 58, 63                      |                                                  |
| Feelings of hope                                                                            | 26                                        |                                                  |
| Feelings of love for work                                                                   | 30                                        |                                                  |
| Feeling that the reciprocal respect between service user and healthcare worker is fulfilled | 52                                        |                                                  |
| Increased individual energy at work                                                         | 30, 58                                    |                                                  |
| Increased gratification                                                                     | 22, 33, 48, 68                            |                                                  |
| Increased gratitude of healthcare workers                                                   | 6, 55                                     |                                                  |

|                                                       |                                                                                            |                                                                                                     |
|-------------------------------------------------------|--------------------------------------------------------------------------------------------|-----------------------------------------------------------------------------------------------------|
|                                                       | Increased motivation at work                                                               | 2, 5, 6, 11, 21, 23, 24, 27, 28, 30, 32, 37, 38, 39, 42, 46, 47, 54, 55, 65, 67                     |
|                                                       | Increased personal satisfaction                                                            | 51, 58                                                                                              |
|                                                       | Increased psychological wellbeing                                                          | 6, 7, 36, 56, 58                                                                                    |
|                                                       | Increased sense of achievement                                                             | 45                                                                                                  |
|                                                       | Greater self-reflection about practice                                                     | 6                                                                                                   |
|                                                       | Source of strength/support during difficult times                                          | 6, 28, 68                                                                                           |
| Work-home interactional change for healthcare workers | Improved familial satisfaction for spouses of healthcare workers                           | 57                                                                                                  |
|                                                       | Improved work-home relationship                                                            | 57                                                                                                  |
| Work-related change for healthcare workers            | Created a positive work environment                                                        | 61                                                                                                  |
|                                                       | Improved communication with service users                                                  | 32                                                                                                  |
|                                                       | Improved team diagnostic and procedural performance                                        | 49                                                                                                  |
|                                                       | Increased commitment to work                                                               | 28, 31, 54, 55                                                                                      |
|                                                       | Increased connection to service users and families                                         | 50, 68                                                                                              |
|                                                       | Increased intention to refer to a service being positively evaluated                       | 15                                                                                                  |
|                                                       | Increased sense of doing meaningful work                                                   | 16, 24, 45, 50                                                                                      |
|                                                       | Increased staff retention                                                                  | 3, 6, 8, 9, 14, 38, 63, 64                                                                          |
|                                                       | Increased work-related activity                                                            | 4                                                                                                   |
|                                                       | Increased work-related satisfaction                                                        | 1, 6, 9, 13, 17, 20, 23, 24, 28, 31, 32, 33, 34, 38, 43, 46, 48, 50, 51, 54, 55, 58, 59, 61, 62, 63 |
|                                                       | Reduced burnout                                                                            | 6, 19, 56                                                                                           |
|                                                       | Reduced perception that assigned tasks are avoidable or outside of job role responsibility | 37                                                                                                  |
| Strengthened therapeutic alliance                     | 35                                                                                         |                                                                                                     |

445

446 Some papers identified undesirable changes (Table 10).

447 **Table 10 - Undesirable changes for healthcare staff identified in included studies**

| Change category                                    | Sub-category                                                                     | Study ID(s) |
|----------------------------------------------------|----------------------------------------------------------------------------------|-------------|
| Short-term emotional change for healthcare workers | Feeling embarrassed when being delivered feedback from tutors                    | 41          |
|                                                    | Feelings of envy and stress when not rewarded with positive feedback             | 55          |
|                                                    | Feelings of guilt after accepting a gift                                         | 35          |
|                                                    | Feelings of tension and pressure to meet philanthropic service user expectations | 66          |

448

449 One change was identified which could be viewed as both helpful and undesirable. An altered responsiveness

450 to grateful service users who give philanthropic gifts could be viewed as helpful as responding more quickly to

451 those giving gifts may increase the likelihood of future donations (56). However, altered responsiveness may  
452 undermine the professional relationship between staff and service-users and result in a decreased  
453 responsiveness to those not giving gifts.

454 *Mechanisms*

455 A mechanism is a process by which positive feedback causes change. Mechanisms identified in included  
456 studies are in Table 11.

457 **Table 11** – *Mechanisms identified as cause of change in included studies*

| <b>Mechanism</b>                                                    | <b>Study ID(s)</b> |
|---------------------------------------------------------------------|--------------------|
| Construction of professional identity as a 'helping professional'   | 17                 |
| Intensified prosocial behaviour of staff at work                    | 49                 |
| Protective resource against trauma involving service users at work  | 36                 |
| Relationship shift between staff and service user after gift-giving | 66                 |
| Staff self-reflection about their practice                          | 41                 |
| Validation of staff role and performance                            | 8, 17, 30          |

458 *Moderators, facilitators, and barriers*

459 Factors were identified which can alter the degree of change following positive feedback. Some factors  
460 enhanced the effect of positive feedback (Table 12).

461 **Table 12** – *Factors enhancing the effect of positive feedback in included studies*

462 Type of factor refers to facilitators [F], or moderators [M].

| <b>Higher-category factors enhancing change</b>      | <b>Sub-factors enhancing change</b>                                                        | <b>Study ID(s)</b>                                                        | <b>Type of factor [F/M]</b> |   |
|------------------------------------------------------|--------------------------------------------------------------------------------------------|---------------------------------------------------------------------------|-----------------------------|---|
| Nature of healthcare role                            | Staff work in the oncology department                                                      | 19, 43, 47                                                                | F                           |   |
|                                                      | Psychological demands of healthcare role are manageable                                    | 19                                                                        | M                           |   |
|                                                      | Staff are confident using Personal Protective Equipment                                    | 56                                                                        | F                           |   |
|                                                      | Nature of individual experience of healthcare system                                       | Staff are enthusiastic about feedback system                              | 65                          | F |
| Nature of individual experience of healthcare system | Staff are confident when asking for feedback                                               | 41                                                                        | F                           |   |
|                                                      | Staff perceive events positively                                                           | 68                                                                        | F                           |   |
|                                                      | Staff have previous experience of working in an environment focussing on negative feedback | 41                                                                        | F                           |   |
|                                                      | Staff having strong occupational identity                                                  | 57                                                                        | M                           |   |
|                                                      | Staff value service users as the source of positive feedback                               | 37, 49                                                                    | F                           |   |
|                                                      | Nature of feedback                                                                         | Positive feedback is received frequently                                  | 6                           | F |
|                                                      |                                                                                            | Feedback given is genuine and central to staff identity within their role | 49                          | F |

463

464 Some studies also identified barriers to change, where the effect of positive feedback was hindered (Table 13).

465 **Table 13** – *Factors hindering the effect of positive feedback in included studies*

| <b>Higher-category factors hindering change</b>      | <b>Sub-factors hindering change</b>                                                                                                                         | <b>Study ID(s)</b> |
|------------------------------------------------------|-------------------------------------------------------------------------------------------------------------------------------------------------------------|--------------------|
| Nature of healthcare role                            | Staff receive positive feedback as a result of other absent medical staff who have delegated tasks; dissatisfaction overshadows positive effect of feedback | 20                 |
|                                                      | Being a nurse compared to being a doctor associated with reduced positive beliefs about community appreciation                                              | 56                 |
|                                                      | Staff experience negative stigma faced during the Covid-19 pandemic as 'plague spreaders'                                                                   | 26                 |
|                                                      | Staff have less opportunity to gain feedback (e.g., night-shift staff)                                                                                      | 65                 |
|                                                      | Staff work in the medical-surgical department                                                                                                               | 47                 |
| Nature of individual experience of healthcare system | Staff experience confidence issues when requesting feedback from service users                                                                              | 41                 |
|                                                      | Staff are not enthusiastic about feedback system                                                                                                            | 65                 |
|                                                      | Staff feel burdensome when asking for feedback from those who have received bad news                                                                        | 41                 |
| Nature of feedback                                   | Feedback system is time-consuming                                                                                                                           | 65                 |
|                                                      | Feedback is not consistently given                                                                                                                          | 32                 |

466

467 Three studies described working in oncology as enhancing the effects of positive feedback. One study

468 described having increased intimacy and closeness with oncology service users, facilitating feelings of reward

469 and satisfaction (58). Another described how working in oncology felt more worthwhile and like a gift, with

470 service users expressing deep appreciation which is not seen in other wards. In comparison, working in a

471 medical-surgical unit can feel robotic (59).

472 One study described how working in oncology had fewer psychological demands (60). The psychological

473 demands of the healthcare role impacted the degree of change between service user gratitude and burnout.

474 Emergency units were perceived to have higher psychological demands than oncology wards, due to work

475 shifts, workloads, and the shorter, more superficial relationships with service users. For emergency nurses,

476 personal accomplishment as a mediator of burnout diminished with increased psychological demands. In

477 contrast, oncology nurses had higher perceptions of service user gratitude and higher personal

478 accomplishment. The institutional context may influence the extent to which staff members are able to

479 encounter and engage with positive feedback.

480 Occupational identity was also identified in another study as factor enhancing the effect of service user  
481 gratitude, with changes to energy within relationships, spousal family satisfaction, and relationship-based  
482 family performance (61). Receiving service user gratitude improved healthcare staff's home environment, and  
483 this was amplified when staff strongly identified with their role.

484 In one study, appreciation reduced the relationship between intrinsic motivation (a type of motivation that is  
485 based on inherent pleasure or passion, rather than extrinsic rewards such as money or fame) and the  
486 perception of illegitimate tasks (62). Illegitimate tasks were unnecessary (tasks that could have been avoided  
487 with better organisation) or unreasonable (tasks that were not the responsibility of that staff member).  
488 Motivated staff perceived a higher number of unnecessary tasks being assigned to them, but appreciation  
489 from service users reduced this relationship.

#### 490 *Mediators*

491 A mediator is a factor which is essential in the change process and must be in place for change to occur. In the  
492 study by Riskin et al (2019), team information sharing partially mediated the impact of gratitude (63). In a  
493 study by Tang et al (2021) energy within relationships mediated the effect of service user gratitude and  
494 spousal family satisfaction (95% CI = 0.007 to 0.042;  $P = .02$ ) and relationship-based family role performance  
495 (95% CI = 0.010 to 0.054;  $P = .03$ ) (61). Receiving gratitude from service users acts as an energy resource within  
496 relationships, which healthcare staff are then able to utilise in the family domain. As a result, increased  
497 relational energy led to increased familial satisfaction.

#### 498 **Change model**

499 Forms of change are summarised in a model presented in Fig 2, which extends a preliminary model from a  
500 prior review (37).

501 **Fig 2.** *How positive feedback from service users, families, and communities can create change in healthcare*  
502 *settings conceptualised in a change model*

503 Listed factors are not exhaustive.

#### 504 **Subgroup analyses**

#### 505 *Quality assessment*

506 Only one study (reported on in two papers) did not meet the 60% threshold for quality assessment due to a  
507 lack of a clear research question (50, 64). Findings from this study were not consequential to the change model  
508 due to these being reinforced by other studies (50).

#### 509 *Studies conducted in a mostly public versus mostly private healthcare system*

510 One difference between studies conducted in a mostly public healthcare system (UK) and mostly private  
511 healthcare systems (US) was the type of positive feedback provided. All UK studies described ambiguous types  
512 of positive feedback. While many US studies also described ambiguous feedback, two described material  
513 feedback in the form of cards, flowers, and gifts (56, 65). One undesirable change was identified in both UK  
514 and US studies. In the UK, research identified that students feel embarrassed when receiving positive feedback  
515 from feedback forms via tutors (66), whereas in the US, tension and pressure surrounding the service user-  
516 professional relationship was identified after gift-giving (56).

## 517 **Discussion**

### 518 **Summary of findings**

519 The review included a broad range of papers presenting evidence that change can be created in health services  
520 using positive patient feedback. The largest body of evidence relates to beneficial short-term emotional  
521 changes experienced by healthcare workers as the result of receiving feedback, such as feeling more hopeful  
522 and motivated, and to beneficial work-related change (such as increased retention and reduced burnout).  
523 Beneficial changes to the home environment were also documented. A small number of undesirable changes  
524 were identified. These included feeling embarrassed when receiving feedback, feeling envy and stress when  
525 not rewarded with positive feedback, and feeling guilt, tension, and pressure when accepting gifts. Tensions  
526 surrounding service user gift-giving may arise due to health professionals being restricted to only accepting  
527 'trivial' gifts, which may create uncertainty in staff regarding boundaries due to vague definitions (67). The  
528 type of gift (such as those marking an occasion, inexpensive, or 'over the top') and recipient (such as individual  
529 staff or donation to the service) may influence staff reactions. Gifts which fail to align with ethical practice,  
530 such as 'over the top' displays of gratitude, may be more likely to produce undesirable change (68).  
531 Importantly, only two intervention studies were identified (63, 65), and neither quantified effect in a real-  
532 world healthcare setting. This means that no evidence on the size of effect produced by positive feedback was

533 available. This points to a substantial gap in knowledge which might be addressed by future research studies. A  
534 broad range of measures were used in quantitative studies, suggesting a lack of consensus in the research  
535 community on the most important constructs to consider, and how to assess them. Most work has been  
536 conducted within the last 10 years, which potentially relates to the widespread emergence of technological  
537 solutions to the collection and distribution of feedback, creating the potential for new forms of intervention.  
538 The current review has identified factors which enhance or hinder the creation of change through feedback.  
539 Some of these factors relate directly to the nature of specific healthcare roles and professions. For example,  
540 change was enhanced if feedback recipients worked in roles which allow more meaningful interaction with  
541 service users, and hindered for feedback recipients working night shifts and hence potentially having less  
542 direct contact with patients. This suggests that positive feedback may not be an accurate measure for  
543 assessing quality of care as some staff are not given the opportunity to influence and receive feedback. It is  
544 unlikely that feedback will be equally received by staff across services due to their varying nature with the  
545 implementation of a single feedback system. Tailoring feedback systems to the settings and contexts in which  
546 staff work may be beneficial to ensure similar opportunities to receive feedback but understanding the  
547 fundamental differences between services is crucial when assessing quality improvement priorities.

#### 548 **Relationship to prior work**

549 The current review extends a previous systematised review which investigated how expressions of service user  
550 gratitude creates change in healthcare services (37). Due to the current review having a mostly broader focus,  
551 68 papers were included compared to 26 papers in the previous review, and this has resulted in a broader  
552 range of short-term emotional benefits and undesirable impacts being identified.

553 In a scoping review investigating service user gratitude in healthcare, receiving gratitude was found to enhance  
554 healthcare worker wellbeing, act as a positive force against stress, increase motivation, increase reciprocated  
555 gratitude, and reduce burnout (35). Aparicio and colleagues identified 32 includable papers, only two of which  
556 were included in the current review (59, 60). Despite a lack of cross-over in included studies due to differences  
557 in inclusion criteria, the findings remain consistent. For instance, gratitude acting as a positive force against  
558 distress is also seen in the current review, categorised as increased psychological wellbeing and a protective

559 force against trauma. The methodology of the current review builds on the scoping review by examining  
560 literature systematically, in line with MRC recommendations (38).

561 The benefits of positive feedback identified in this review may be particularly relevant for the occupational  
562 health of healthcare staff. For example, the number of nurses leaving the profession rose in 2021 by 25% (69),  
563 with increased workload leading to higher levels of burnout (70). Healthcare workers have been found to have  
564 high levels of intrinsic motivation, where motivation to perform well is a product of inner drives. This was  
565 particularly evident in permanent healthcare staff (71). Validation of having done good work may therefore be  
566 positively reinforced with positive feedback and be of greater value than for those who are extrinsically  
567 motivated by factors such as financial reward or promotion (72). Increased intrinsic motivation may boost  
568 affective commitment and lead to reduced turnover intention among healthcare staff (73). Similarly, finding  
569 intrinsic meaning in their work was helpful for healthcare workers in Japan to cope during the Covid pandemic  
570 (24)). Self-determination theory also suggests that intrinsic motivation can assist with the development of  
571 professional identity for healthcare staff (74).

572 Shifting healthcare staff attitudes surrounding service user feedback may be essential for implementing  
573 meaningful change which utilises positive feedback due to the belief that feedback is largely negative (13). The  
574 Lewin Change model describes three steps for creating change (75), starting with 'unfreezing' whereby a shift  
575 away from current beliefs is initiated through challenging defensiveness towards change and dismantling  
576 current views. This may be possible through exposure to positive feedback. The second stage is 'movement'  
577 which describes a change occurring, such as beneficial outcomes as a result of positive feedback. The third  
578 stage is 'refreezing' which describes a replacement of old views and processes with new ones, which begins to  
579 normalise the new methods of operating. For positive feedback in healthcare, this may reflect system-level  
580 change such as policy implementation.

581 However, this model may be limited to healthcare staff's willingness to engage with positive feedback. The  
582 idea of a 'learning organisation' was introduced by Senge, who described a group of people continually  
583 working to enhance their capacities and create results that they want (76). A learning organisation describes  
584 one which is not operating as a machine, but rather a humanistic never-ending process of development and  
585 learning. Adapted for healthcare settings, learning organisations have five disciplines (77). 'Open systems  
586 thinking' describes services being viewed as a whole rather than isolated by disease, procedures, or structures,



587 and aims to create interconnectedness beyond departmental boundaries. ‘Improving individual capabilities’  
588 describes striving for excellence by improving personal proficiencies of staff. ‘Team learning’ describes learning  
589 as a collective rather than via single professionals. ‘Updating mental models’ describes updating the deeply  
590 held assumptions and generalisations held by individuals within the organisation and finding new ways of  
591 operating. Finally, ‘a cohesive vision’ describes empowering and enabling staff being counterbalanced by  
592 strategic direction and clear values to guide individual action to produce shared understanding. Healthcare  
593 systems have identified that being a ‘learning organisation’ encourages a culture celebrating innovation and  
594 success (77). Positive feedback may offer a means for learning organisations to create a cultural shift towards  
595 valuing positive service user experiences rather than focussing solely on negative incidents and risk reduction.

## 596 **Strengths and limitations**

597 A strength of the review is that a broad range of publications databases was searched, including a database  
598 specific to computing publications and rarely used in systematic reviews, which is important when feedback is  
599 routinely collected through technological means. Compared to the prior narrower review, broader inclusion  
600 criteria have enabled the inclusion of papers describing changes to healthcare systems, enabling the  
601 identification of changes such as increased referral intentions following positive feedback from service users  
602 about a particular service (78). The addition of search terms such as ‘positive feedback’ and ‘positive  
603 evaluation’ have enabled new forms of change to be identified, such as non-clinical staff benefiting from  
604 positive feedback as well as those in clinical roles. A strength of the review is that inclusion criteria were  
605 carefully designed to exclude papers where there was ambiguity about the source of feedback or the direction  
606 of change, meaning that studies were excluded where causality was uncertain, such as in studies using  
607 correlation analyses (79). This has provided a solid foundation to develop a change model.

608 Another strength of the review is that it was inclusive of studies which were conducted in non-WEIRD  
609 (western, educated, industrialised, rich, and democratic) countries, despite being limited to papers published  
610 in English. For example, included studies reflected healthcare systems in eight African regions. Although  
611 emotional expressions differ across cultures (15), positive feedback was deemed helpful to healthcare  
612 organisational outcomes. Findings were robust across studies despite differing locations and healthcare  
613 systems, reinforcing the value of positive feedback.

614 A limitation of the review is that the definition of positive feedback is not straightforward. A subgroup analysis  
615 was planned for documents which identify change through expressions of healthcare service user gratitude  
616 specifically. Ambiguity in the distinction between positive feedback and gratitude definitions meant that the  
617 subgroup analysis could not be performed. Medical definitions of positive feedback describe the body being  
618 amplified from its normal state (80), but this review did not include positive physical or medical signals from  
619 service users. However, seeing a patient improve was described in some studies as a form of positive feedback  
620 (81). Physiological markers may not reflect positive healthcare experiences and would not reflect quality of  
621 care given by palliative care teams. Further, service user gratitude was seen to create change for other service  
622 users (20), but this was excluded as it could not be considered a change for healthcare staff or systems.  
623 Furthermore, positive feedback was defined as a response from healthcare service users, families or the  
624 community indicating concordance between desired and actual experiences regarding their care or treatment,  
625 delivered to healthcare staff or systems. However, the assumption was made that positive feedback was  
626 expressed with the intention of communicating this concordance between desired and actual care, but other  
627 contextual and motivating factors may have existed, such as feeling obligated to give positive responses when  
628 asked for feedback in person (82), service users attempting to influence their future care and treatment and  
629 prevent punitive treatment for negative feedback (20), and social norms surrounding expressions of thanks  
630 which may be expressed habitually (83).

## 631 **Implications of the review and change model**

### 632 *Implications for practice*

633 Managers of health service units seeking to address problems such as staff burnout or low motivation should  
634 consider the integration of mechanisms for making positive feedback available to staff members and should  
635 seek to identify barriers to the use of positive feedback in their units. Health service managers in units already  
636 making use of positive feedback should examine whether particular staff groups are disadvantaged, for  
637 example if working in circumstances that make the provision of positive feedback more difficult, or increasing  
638 exposure of positive feedback to individuals from minority ethnic backgrounds who may be more likely to  
639 receive complaints (84). Policymakers should consider adopting policies that encourage the collection and  
640 distribution of positive feedback. Requirements of healthcare professional bodies to make use of feedback in

641 reflective practice might be used to motivate change, though it is unclear whether this phenomenon extends  
642 beyond the UK. This may also exclude individuals whose roles do not require professional registration.  
643 Integrating positive feedback from service users, families, or communities into standard clinical supervision  
644 rather than formal requirements may create an attitudinal shift away from revalidation scepticism to become  
645 an essential part of practice (28). Effective clinical supervision can prevent burnout (85), and positive feedback  
646 may enhance these benefits.

#### 647 *Implications for research*

648 There is a need for the research community to conduct and replicate intervention studies of precisely  
649 designed feedback interventions, ideally in the form of randomised controlled trials designed to collect  
650 evidence on effectiveness and cost-effectiveness. The research community should seek to reach consensus on  
651 the most important measures to be assessed in trials, to enable meta-analyses pooling findings from multiple  
652 trials to be conducted. Future research may investigate the effects of positive feedback depending on  
653 healthcare role, comparing those who have consistent access to feedback (such as oncology staff) (59), to  
654 those who feel overlooked and undervalued (such as healthcare assistants) (86). Future research may  
655 investigate the effects of positive feedback at multiple levels of the organisation, such as individual impacts  
656 like resilience, and organisational culture and system-level change, and whether the effect of positive feedback  
657 changes depending on individual or team receipt.

658 The research community should also aim to investigate the influence of feedback content and form in eliciting  
659 change and whether content has practical utility. Examples include whether content of feedback is meaningful  
660 to staff, and if relationships with service users are more significant than numerical indicators of satisfaction.  
661 Feedback with specific utility, such as an appointment being 'on time', may also produce differing effects to  
662 interpersonal emotional connections. This may assist with the development of a typology to characterise  
663 feedback and assist with understanding whether positive feedback should be used and delivered universally.  
664 Research may also benefit from being co-designed with healthcare workers with practical knowledge to  
665 enhance the functional integration of findings into clinical practice.

## 666 Conclusions

667 Positive feedback from service users, families, and the community can lead to meaningful change. Change is  
668 largely positive, with emotional, familial, and work-related change being recognised. However, some  
669 undesirable changes were identified in relation to healthcare staff emotions. Overall, positive feedback  
670 provides the opportunity to create meaningful change but requires further interventional investigation.

## 671 Acknowledgements

672 For the purposes of open access, the authors have applied a CC BY public copyright license to any author  
673 accepted manuscript version arising from this submission

## 674 References

- 675 1. Ramani S, Könings KD, Ginsburg S, van der Vleuten CPM. Feedback Redefined: Principles and Practice.  
676 *Journal of General Internal Medicine*. 2019;34(5):744-9.
- 677 2. Hardavella G, Aamli-Gagnat A, Saad N, Rousalova I, Sreter KB. How to give and receive feedback  
678 effectively. *Breathe*. 2017;13(4):327-33.
- 679 3. Barello S, Graffigna G, Vegni E. Patient Engagement as an Emerging Challenge for Healthcare Services:  
680 Mapping the Literature. *Nursing Research and Practice*. 2012;2012:905934.
- 681 4. Locock L, Graham C, King J, Parkin S, Chisholm A, Montgomery C, et al. Understanding how front-line  
682 staff use patient experience data for service improvement: an exploratory case study evaluation. 2020;8:13.
- 683 5. Coulter A, Locock L, Ziebland S, Calabrese J. Collecting data on patient experience is not enough: they  
684 must be used to improve care. *BMJ : British Medical Journal*. 2014;348:g2225.
- 685 6. Brookes G, Baker P. What does patient feedback reveal about the NHS? A mixed methods study of  
686 comments posted to the NHS Choices online service. *BMJ open*. 2017;7(4):e013821.
- 687 7. Stahl K, Groene O. ASK ME!—Routine measurement of patient experience with patient safety in  
688 ambulatory care: A mixed-mode survey. *PLOS ONE*. 2021;16(12):e0259252.
- 689 8. Marsh C, Peacock R, Sheard L, Hughes L, Lawton R. Patient experience feedback in UK hospitals: What  
690 types are available and what are their potential roles in quality improvement (QI)? *Health Expectations*.  
691 2019;22(3):317-26.
- 692 9. Maxwell E, Lamont T. Improving care by using patient feedback. 2019.
- 693 10. Capozzi JD, Rhodes R. Gifts from Patients. *JBJS*. 2004;86(10).
- 694 11. Gillespie A, Reader TW. Identifying and encouraging high-quality healthcare: an analysis of the  
695 content and aims of patient letters of compliment. *BMJ quality & safety*. 2021;30(6):484-92.
- 696 12. James TL, Villacis Calderon ED, Cook DF. Exploring patient perceptions of healthcare service quality  
697 through analysis of unstructured feedback. *Expert Systems with Applications*. 2017;71:479-92.
- 698 13. Powell J, Atherton H, Williams V, Mazanderani F, Dudhwala F, Woolgar S, et al. Using online patient  
699 feedback to improve NHS services: the INQUIRE multimethod study. *Health Services and Delivery Research*.  
700 2019;7(38).
- 701 14. Lewandowska-Tomaszczyk B, Wilson PA. Expressive and reserved cultural linguistic schemas: British  
702 and American pride clusters. *Cultural linguistics and world Englishes*: Springer; 2021. p. 261-93.
- 703 15. Lim N. Cultural differences in emotion: differences in emotional arousal level between the East and  
704 the West. *Integrative medicine research*. 2016;5(2):105-9.
- 705 16. Maxwell E. Patient feedback: how effectively is it collected and used. *Nurs Times*. 2020;116(12):27-9.
- 706 17. Emmons RA, McNamara P. Sacred emotions and affective neuroscience: Gratitude, costly signaling,  
707 and the brain. Where God and science meet: How brain and evolutionary studies alter our understanding of  
708 religion. 2006;1:11-31.
- 709 18. Aparicio M, Centeno C, Carrasco JM, Barbosa A, Arantzamendi M. What are families most grateful for  
710 after receiving palliative care? Content analysis of written documents received: a chance to improve the  
711 quality of care. *BMC palliative care*. 2017;16(1):1-11.

- 712 19. Day G, Robert G, Leedham-Green K, Rafferty AM. An outbreak of appreciation: A discursive analysis of  
713 tweets of gratitude expressed to the National Health Service at the outset of the COVID-19 pandemic. *Health*  
714 *Expectations*. 2022;25(1):149-62.
- 715 20. Campbell C, Scott K, Skovdal M, Madanhire C, Nyamukapa C, Gregson S. A good patient? How notions  
716 of 'a good patient' affect patient-nurse relationships and ART adherence in Zimbabwe. *BMC infectious*  
717 *diseases*. 2015;15:404.
- 718 21. The Point of Care Foundation. Case study 1: Oxleas Mental Health Trust 2022 [Available from:  
719 [https://www.pointofcarefoundation.org.uk/resource/experience-based-co-design-ebcd-toolkit/case-](https://www.pointofcarefoundation.org.uk/resource/experience-based-co-design-ebcd-toolkit/case-studies/case-study-1-oxleas-mental-health-trust/)  
720 [studies/case-study-1-oxleas-mental-health-trust/](https://www.pointofcarefoundation.org.uk/resource/experience-based-co-design-ebcd-toolkit/case-studies/case-study-1-oxleas-mental-health-trust/)].
- 721 22. NHS England. Friends and Family Test 2022 [Available from: <https://www.england.nhs.uk/fft/>].
- 722 23. NHS England. Using the Friends and Family Test to gain insight on the trust's response to the  
723 pandemic: NHS England; 2022 [Available from: [https://www.england.nhs.uk/fft/case-studies/using-the-fft-to-](https://www.england.nhs.uk/fft/case-studies/using-the-fft-to-gain-insight-on-the-trusts-response-to-the-pandemic/)  
724 [gain-insight-on-the-trusts-response-to-the-pandemic/](https://www.england.nhs.uk/fft/case-studies/using-the-fft-to-gain-insight-on-the-trusts-response-to-the-pandemic/)].
- 725 24. Kotera Y, Ozaki A, Miyatake H, Tsunetoshi C, Nishikawa Y, Kosaka M, et al. Qualitative Investigation  
726 into the mental health of healthcare workers in Japan during the COVID-19 Pandemic. *International journal of*  
727 *environmental research and public health*. 2022;19(1):568.
- 728 25. Nursing & Midwifery Council. Revalidation 2021 [Available from:  
729 <https://www.nmc.org.uk/revalidation/>].
- 730 26. General Medical Council. Your supporting information – feedback from patients or those you provide  
731 medical services to 2022 [Available from: [https://www.gmc-uk.org/registration-and-licensing/managing-your-](https://www.gmc-uk.org/registration-and-licensing/managing-your-registration/revalidation/guidance-on-supporting-information-for-appraisal-and-revalidation/your-supporting-information---feedback-from-patients-or-those-to-whom-you-provide-medical-services)  
732 [registration/revalidation/guidance-on-supporting-information-for-appraisal-and-revalidation/your-supporting-](https://www.gmc-uk.org/registration-and-licensing/managing-your-registration/revalidation/guidance-on-supporting-information-for-appraisal-and-revalidation/your-supporting-information---feedback-from-patients-or-those-to-whom-you-provide-medical-services)  
733 [information---feedback-from-patients-or-those-to-whom-you-provide-medical-services](https://www.gmc-uk.org/registration-and-licensing/managing-your-registration/revalidation/guidance-on-supporting-information-for-appraisal-and-revalidation/your-supporting-information---feedback-from-patients-or-those-to-whom-you-provide-medical-services)].
- 734 27. Health & Care Professionals Council. Standards of continuing professional development 2018  
735 [Available from: <https://www.hcpc-uk.org/standards/standards-of-continuing-professional-development/>].
- 736 28. Tazzyman A, Ferguson J, Hillier C, Boyd A, Tredinnick-Rowe J, Archer J, et al. The implementation of  
737 medical revalidation: an assessment using normalisation process theory. *BMC Health Services Research*.  
738 2017;17(1):749.
- 739 29. Griffiths A, Leaver MP. Wisdom of patients: predicting the quality of care using aggregated patient  
740 feedback. *BMJ Quality & Safety*. 2018;27(2):110.
- 741 30. NHS Improving Quality. Five steps towards quality improvement: A simple guide to improving  
742 services. 2014.
- 743 31. Wensing M, Vingerhoets E, Grol R. Feedback based on patient evaluations: a tool for quality  
744 improvement? *Patient Education and Counseling*. 2003;51(2):149-53.
- 745 32. Ramsey LP, Sheard L, Lawton R, O'Hara J. How do healthcare staff respond to patient experience  
746 feedback online? A typology of responses published on care opinion. *Patient Experience Journal*. 2019;6(2):42-  
747 50.
- 748 33. Donetto S, Desai A, Zoccatelli G, Robert G, Allen D, Brearley S, et al. Organisational strategies and  
749 practices to improve care using patient experience data in acute NHS hospital trusts: an ethnographic study.  
750 2019;7:34.
- 751 34. Day G. Enhancing relational care through expressions of gratitude: insights from a historical case  
752 study of almoner–patient correspondence. *Medical Humanities*. 2020;46(3):288.
- 753 35. Aparicio M, Centeno C, Robinson C, Arantzamendi M. Gratitude between patients and their families  
754 and health professionals: A scoping review. *Journal of Nursing Management*. 2019;27(2):286-300.
- 755 36. Day G, Robert G, Rafferty AM. Gratitude in health care: A meta-narrative review. *Qualitative health*  
756 *research*. 2020;30(14):2303-15.
- 757 37. Lloyd R, Rennick-Egglestone S. A systematic review investigating how expressions of patient gratitude  
758 can create change in healthcare settings [Protocol Registration]. National Institute for Health Research.  
759 2021;PROSPERO 2021 CRD42021265334. .
- 760 38. Craig P, Dieppe P, MacIntyre S, Michie S, Nazareth I, Petticrew M. Developing and evaluating complex  
761 interventions 2019 [Available from: [www.mrc.ac.uk/complexinterventionsguidance](http://www.mrc.ac.uk/complexinterventionsguidance)].
- 762 39. Page MJ, McKenzie JE, Bossuyt PM, Boutron I, Hoffmann TC, Mulrow CD, et al. The PRISMA 2020  
763 statement: an updated guideline for reporting systematic reviews. *Systematic reviews*. 2021;10(1):1-11.
- 764 40. Popay J, Roberts H, Sowden A, Petticrew M, Arai L, Rodgers M, et al. Guidance on the conduct of  
765 narrative synthesis in systematic reviews. A product from the ESRC methods programme Version.  
766 2006;1(1):b92.

- 767 41. Methley AM, Campbell S, Chew-Graham C, McNally R, Cheraghi-Sohi S. PICO, PICOS and SPIDER: a  
768 comparison study of specificity and sensitivity in three search tools for qualitative systematic reviews. *BMC*  
769 *health services research*. 2014;14(1):1-10.
- 770 42. The DAISY Foundation. What is The DAISY Award? 2022 [Available from:  
771 <https://www.daisyfoundation.org/daisy-award>.
- 772 43. Trajkovski S, Schmied V, Vickers M, Jackson D. Using appreciative inquiry to transform health care.  
773 *Contemporary nurse*. 2013;45(1):95-100.
- 774 44. Cox CL. 'Healthcare Heroes': problems with media focus on heroism from healthcare workers during  
775 the COVID-19 pandemic. *Journal of Medical Ethics*. 2020;46(8):510.
- 776 45. The EndNote Team. EndNote. EndNote X9 ed. Philadelphia, PA: Clarivate; 2013.
- 777 46. Baron RM, Kenny DA. The moderator–mediator variable distinction in social psychological research:  
778 Conceptual, strategic, and statistical considerations. 1986;51:1173-82.
- 779 47. Hong QN, Fàbregues S, Bartlett G, Boardman F, Cargo M, Dagenais P, et al. The Mixed Methods  
780 Appraisal Tool (MMAT) version 2018 for information professionals and researchers. *Education for information*.  
781 2018;34(4):285-91.
- 782 48. Zulu JM, Kinsman J, Michelo C, Hurtig A-K. Hope and despair: community health assistants'  
783 experiences of working in a rural district in Zambia. *Human resources for health*. 2014;12:30.
- 784 49. Zulu JM, Michelo C, Kinsman J, Hurtig A-K. 1/3. Hope and despair: the community health assistant role  
785 in Zambia. *British Journal of Healthcare Assistants*. 2015;9(9):458-65.
- 786 50. Kelly D, Lankshear A, Wiseman T, Jahn P, Mall-Roosmae H, Rannus K, et al. The experiences of cancer  
787 nurses working in four European countries: A qualitative study. *European journal of oncology nursing : the*  
788 *official journal of European Oncology Nursing Society*. 2020;49:101844.
- 789 51. Prytherch H, Kagoné M, Aninanya GA, Williams JE, Kakoko DC, Leshabari MT, et al. Motivation and  
790 incentives of rural maternal and neonatal health care providers: a comparison of qualitative findings from  
791 Burkina Faso, Ghana and Tanzania. *BMC Health Services Research*. 2013;13(1):149-.
- 792 52. Danet AD, Jimenez Cardoso PM, Perez Villares JM. Emotional paths of professional experiences in  
793 transplant coordinators. *Rutas emocionales en las experiencias profesionales de los equipos de coordinacion*  
794 *de trasplantes*. 2020;40(1):74-90.
- 795 53. MacLeod MLP, Zimmer LV, Kosteniuk JG, Penz KL, Stewart NJ. The meaning of nursing practice for  
796 nurses who are retired yet continue to work in a rural or remote community. *BMC Nursing*. 2021;20(1):1-13.
- 797 54. Warburton J, Moore ML, Clune SJ, Hodgkin SP. Extrinsic and intrinsic factors impacting on the  
798 retention of older rural healthcare workers in the north Victorian public sector: a qualitative study. *Rural and*  
799 *Remote Health*. 2014;14(3):[131]-[46].
- 800 55. Martinez-Taboas A, Cordero-Soto MM, Davila T, Oben A, Pujals K, Medina M, et al. Gifts in  
801 psychotherapy: Attitudes and experiences of Puerto Rican psychotherapists. *Revista Puertorriquena de*  
802 *Psicologia*. 2014;25(2):328-39.
- 803 56. Wright SM, Wolfe L, Stewart R, Flynn JA, Paisner R, Rum S, et al. Ethical concerns related to grateful  
804 patient philanthropy: The physician's perspective. *Journal of General Internal Medicine*. 2013;28(5):645-51.
- 805 57. Zwack J, Schweitzer J. If every fifth physician is affected by burnout, what about the other four?  
806 Resilience strategies of experienced physicians. *Academic Medicine*. 2013;88(3):382-9.
- 807 58. Peteet JR, Ross DM, Medeiros C, Walsh-Burke K, et al. Relationships with patients in oncology: Can a  
808 clinician be a friend? *Psychiatry: Interpersonal and Biological Processes*. 1992;55(3):223-9.
- 809 59. Raingruber B, Wolf T. Nurse perspectives regarding the meaningfulness of oncology nursing practice.  
810 2015(1538-067X (Electronic)).
- 811 60. Converso D, Loera B, Viotti S, Martini M. Do positive relations with patients play a protective role for  
812 healthcare employees? Effects of patients' gratitude and support on nurses' burnout. *Frontiers in Psychology*.  
813 2015;6.
- 814 61. Tang PM, Ilies R, Aw SS, Lin KJ, Lee R, Trombini C. How and when service beneficiaries' gratitude  
815 enriches employees' daily lives. *Journal of Applied Psychology*. 2021.
- 816 62. Muntz J, Dormann C. Moderating effects of appreciation on relationships between illegitimate tasks  
817 and intrinsic motivation: A two-wave shortitudinal study. *European Journal of Work and Organizational*  
818 *Psychology*. 2020;29(3):391-404.
- 819 63. Riskin A, Bamberger P, Erez A, Riskin-Guez K, Riskin Y, Sela R, et al. Expressions of gratitude and  
820 medical team performance. *Pediatrics*. 2019;143(4).
- 821 64. Hendren K, Luo QE, Pandey SK. The state of mixed methods research in public administration and  
822 public policy. *Public Administration Review*. 2018;78(6):904-16.



- 823 65. Weaver SH. The impact of real-time patient feedback using a gamified system. *Nursing Management*.  
824 2020;51(12):14-22.
- 825 66. Pal LM, Dixon RE, Faull CM. Utilising feedback from patients and their families as a learning strategy in  
826 a Foundation Degree in palliative and supportive care: A qualitative study. *Nurse Education Today*.  
827 2014;34(3):319-24.
- 828 67. Royal College of Nursing. Gifts and wills 2022 [Available from: [https://www.rcn.org.uk/Get-Help/RCN-](https://www.rcn.org.uk/Get-Help/RCN-advice/gifts-and-wills)  
829 [advice/gifts-and-wills](https://www.rcn.org.uk/Get-Help/RCN-advice/gifts-and-wills)].
- 830 68. Zolkefli Y. Healthcare Dilemma Towards Gift Giving by Patients. *The Malaysian Journal of Medical*  
831 *Sciences: MJMS*. 2021;28(5):137.
- 832 69. Nursing Notes. New NMC figures reveal sharp rise in nurses leaving the profession 2021 [Available  
833 from: [https://nursingnotes.co.uk/news/workforce/new-nmc-figures-reveal-sharp-rise-in-nurses-leaving-the-](https://nursingnotes.co.uk/news/workforce/new-nmc-figures-reveal-sharp-rise-in-nurses-leaving-the-profession/)  
834 [profession/](https://nursingnotes.co.uk/news/workforce/new-nmc-figures-reveal-sharp-rise-in-nurses-leaving-the-profession/)].
- 835 70. Greenglass ER, Burke RJ, Fiksenbaum L. Workload and burnout in nurses. *Journal of Community &*  
836 *Applied Social Psychology*. 2001;11(3):211-5.
- 837 71. Kumar P, Mehra A, Inder D, Sharma N. Organizational commitment and intrinsic motivation of regular  
838 and contractual primary health care providers. *Journal of family medicine and primary care*. 2016;5(1):94.
- 839 72. Kotera Y, Conway E, Van Gordon W. Ethical Judgement in UK Business Students: Relationship with  
840 Motivation, Self-Compassion and Mental Health. *International Journal of Mental Health and Addiction*.  
841 2019;17(5):1132-46.
- 842 73. Galletta M, Portoghese I, Battistelli A. Intrinsic Motivation, Job Autonomy and Turnover Intention in  
843 the Italian Healthcare: The Mediating Role of Affective Commitment. *Journal of Management Research*.  
844 2011;3(2):E7.
- 845 74. Wilkins EB. Facilitating Professional Identity Development in Healthcare Education. *New Directions for*  
846 *Teaching and Learning*. 2020;2020(162):57-69.
- 847 75. Lewin K. *Field theory in social science: selected theoretical papers* (Edited by Dorwin Cartwright.).  
848 1951.
- 849 76. Senge PM. *The fifth discipline: The art and practice of the learning organization*: Broadway Business;  
850 2006.
- 851 77. Davie HTO, Nutley SM. Developing learning organisations in the new NHS. *BMJ*. 2000;320(7240):998.
- 852 78. Chou WC, Tinetti ME, King MB, Irwin K, Fortinsky RH. Perceptions of physicians on the barriers and  
853 facilitators to integrating fall risk evaluation and management into practice. *Journal of general internal*  
854 *medicine*. 2006;21(2):117-22.
- 855 79. Prins JT, Hoekstra-Weebers JEHM, Gazendam-Donofrio SM, van de Wiel HBM, Sprangers F, Jaspers  
856 FCA, et al. The role of social support in burnout among Dutch medical residents. *Psychology, Health &*  
857 *Medicine*. 2007;12(1):1-6.
- 858 80. Davis CP. Medical Definition of Feedback 2021 [Available from:  
859 <https://www.medicinenet.com/feedback/definition.htm>].
- 860 81. McCollum R, Otiso L, Mireku M, Theobald S, de Koning K, Hussein S, et al. Exploring perceptions of  
861 community health policy in Kenya and identifying implications for policy change. *Health Policy and Planning*.  
862 2016;31(1):10-20.
- 863 82. Dudhwala F, Boylan A-M, Williams V, Powell J. VIEWPOINT: What counts as online patient feedback,  
864 and for whom? *DIGITAL HEALTH*. 2017;3:2055207617728186.
- 865 83. Ohashi J. Linguistic rituals for thanking in Japanese: Balancing obligations. *Journal of Pragmatics*.  
866 2008;40(12):2150-74.
- 867 84. Wise J. Poor induction and lack of honest feedback is blamed for higher rate of GMC referrals among  
868 BAME doctors. *BMJ*. 2019;365:l4391.
- 869 85. Edwards D, Burnard P, Hannigan B, Cooper L, Adams J, Juggessur T, et al. Clinical supervision and  
870 burnout: the influence of clinical supervision for community mental health nurses. *Journal of Clinical Nursing*.  
871 2006;15(8):1007-15.
- 872 86. Fee A, Muldrew D, Slater P, Payne S, McIlpatrick S, McConnell T, et al. The roles, responsibilities and  
873 practices of healthcare assistants in out-of-hours community palliative care: A systematic scoping review.  
874 *Palliative Medicine*. 2020;34(8):976-88.

## 875 Supporting information captions

876 S1 File. Amendments to search strategy for CINAHL, ASSIA and the ACM Digital Library

- 877 S2 File. PRISMA checklist
- 878 S3 Table. Full data abstraction table



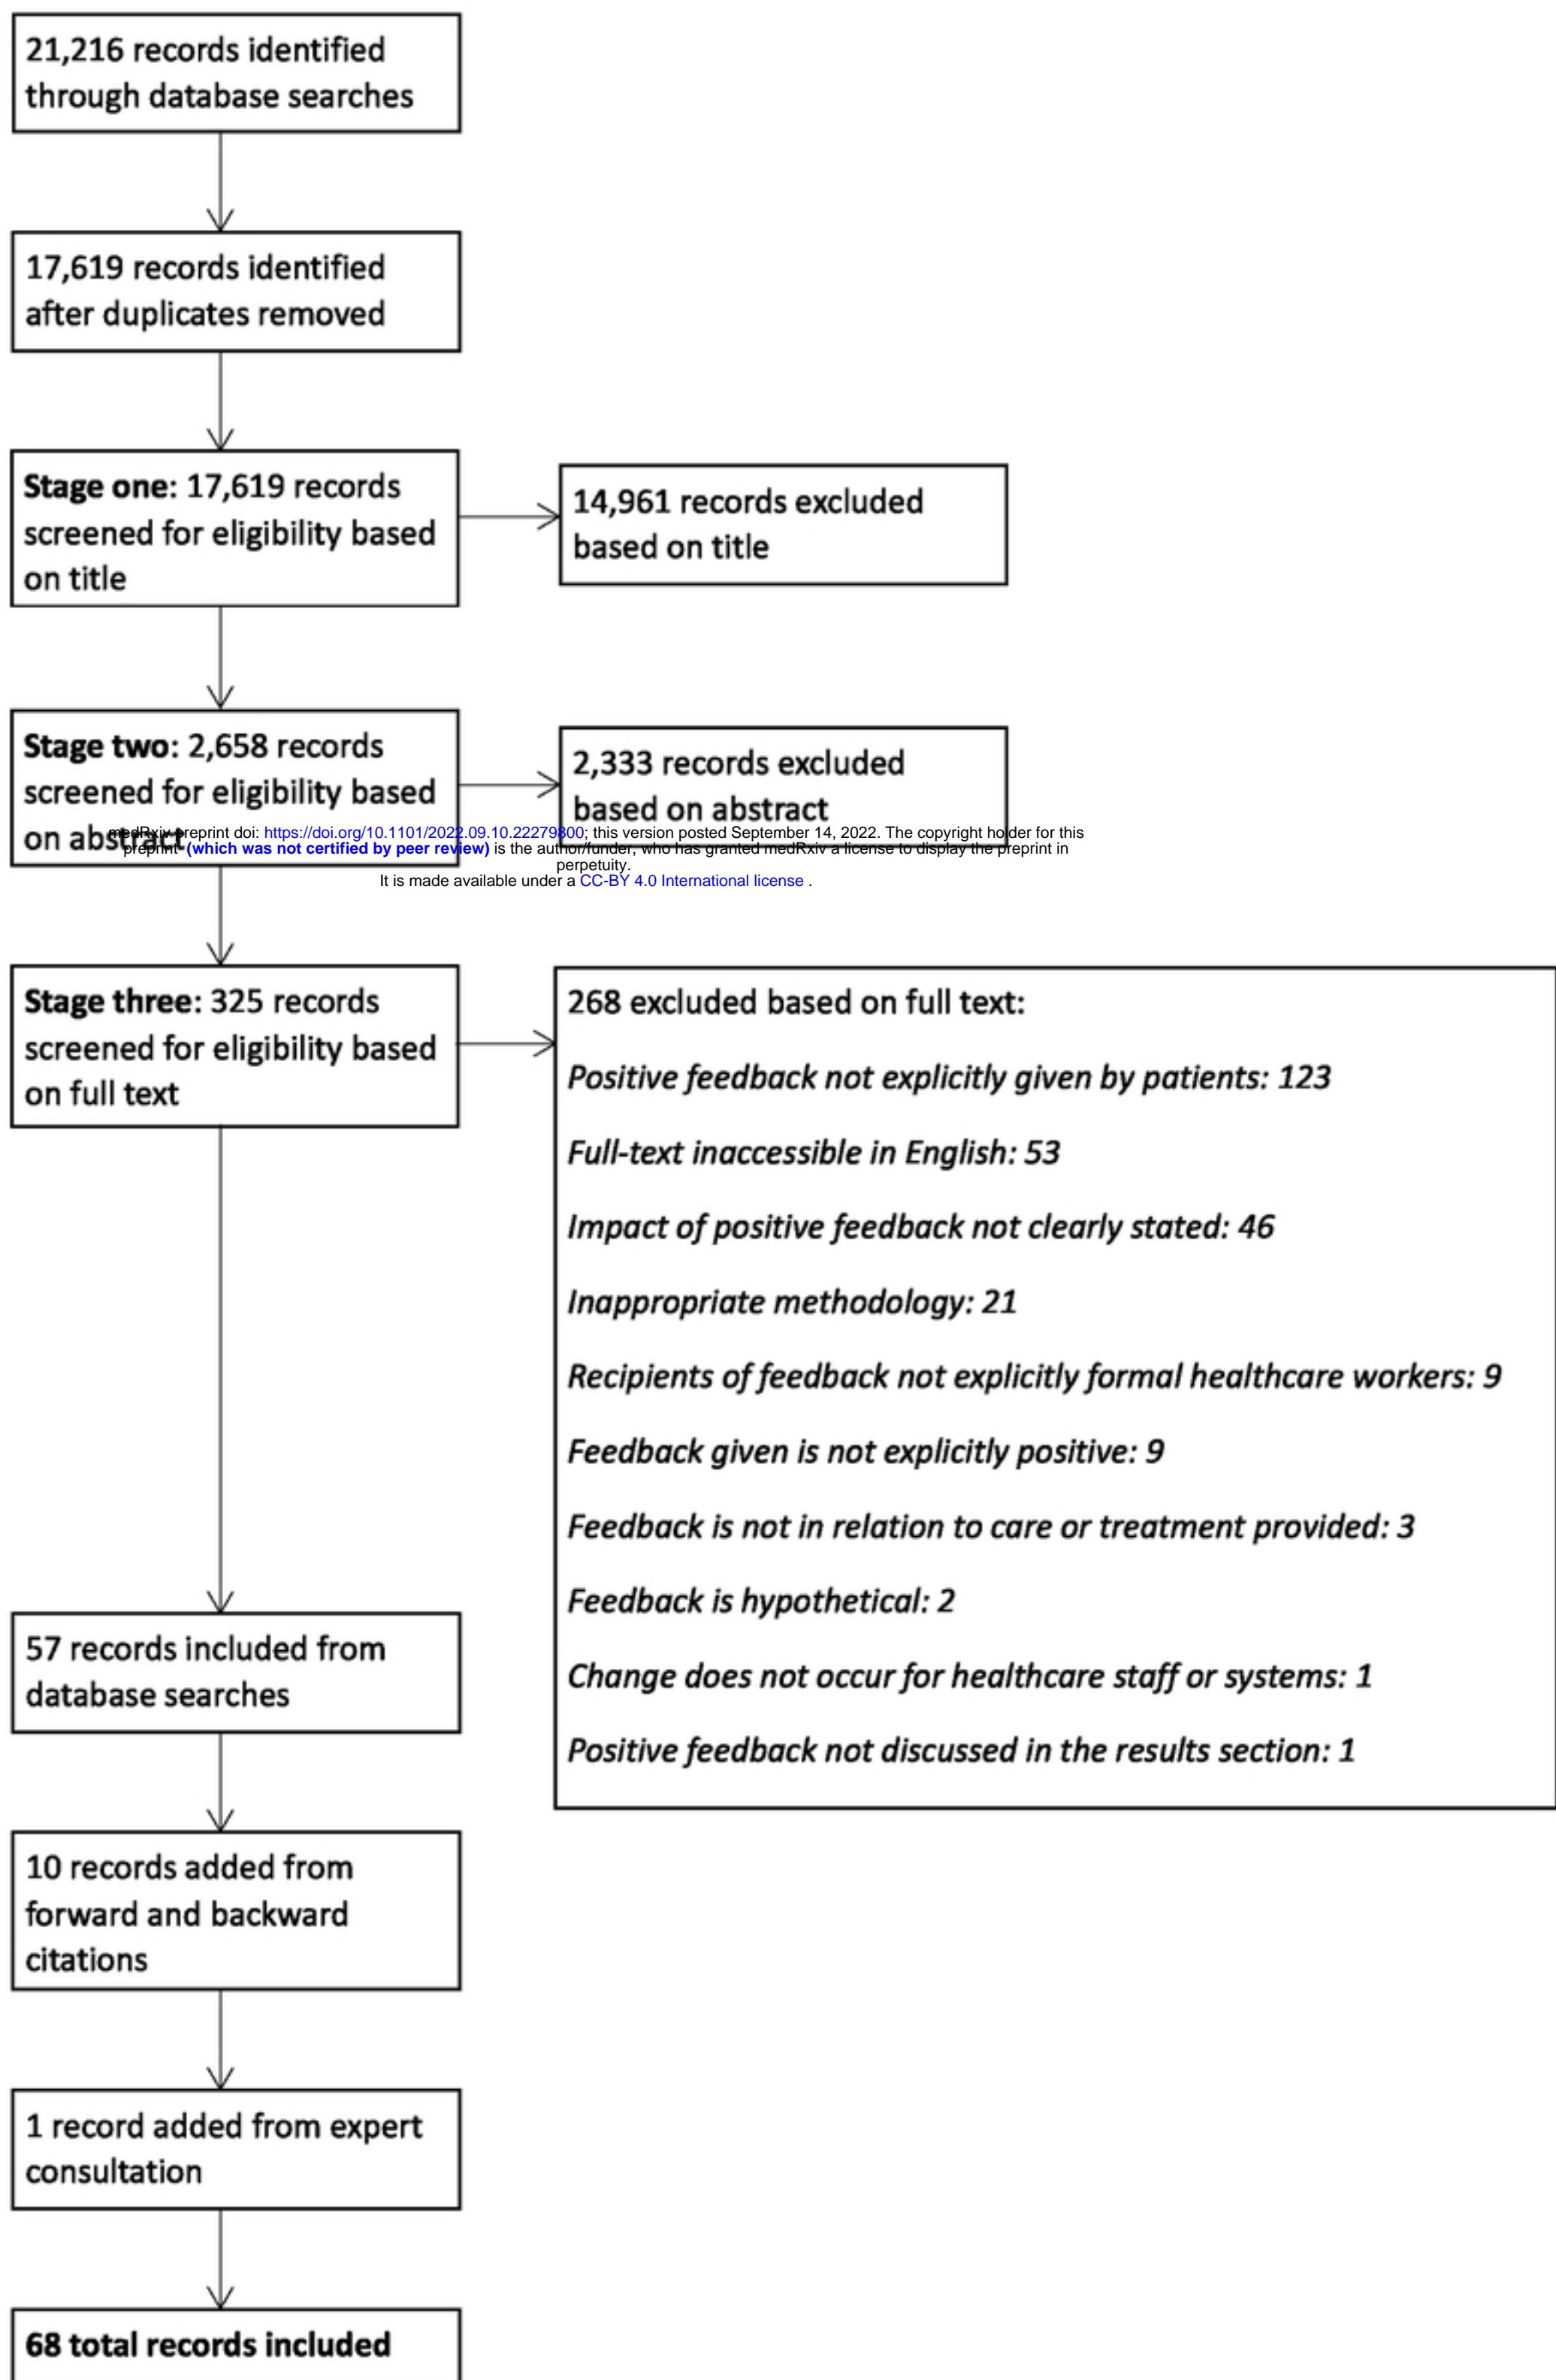

PRISMA flow diagram

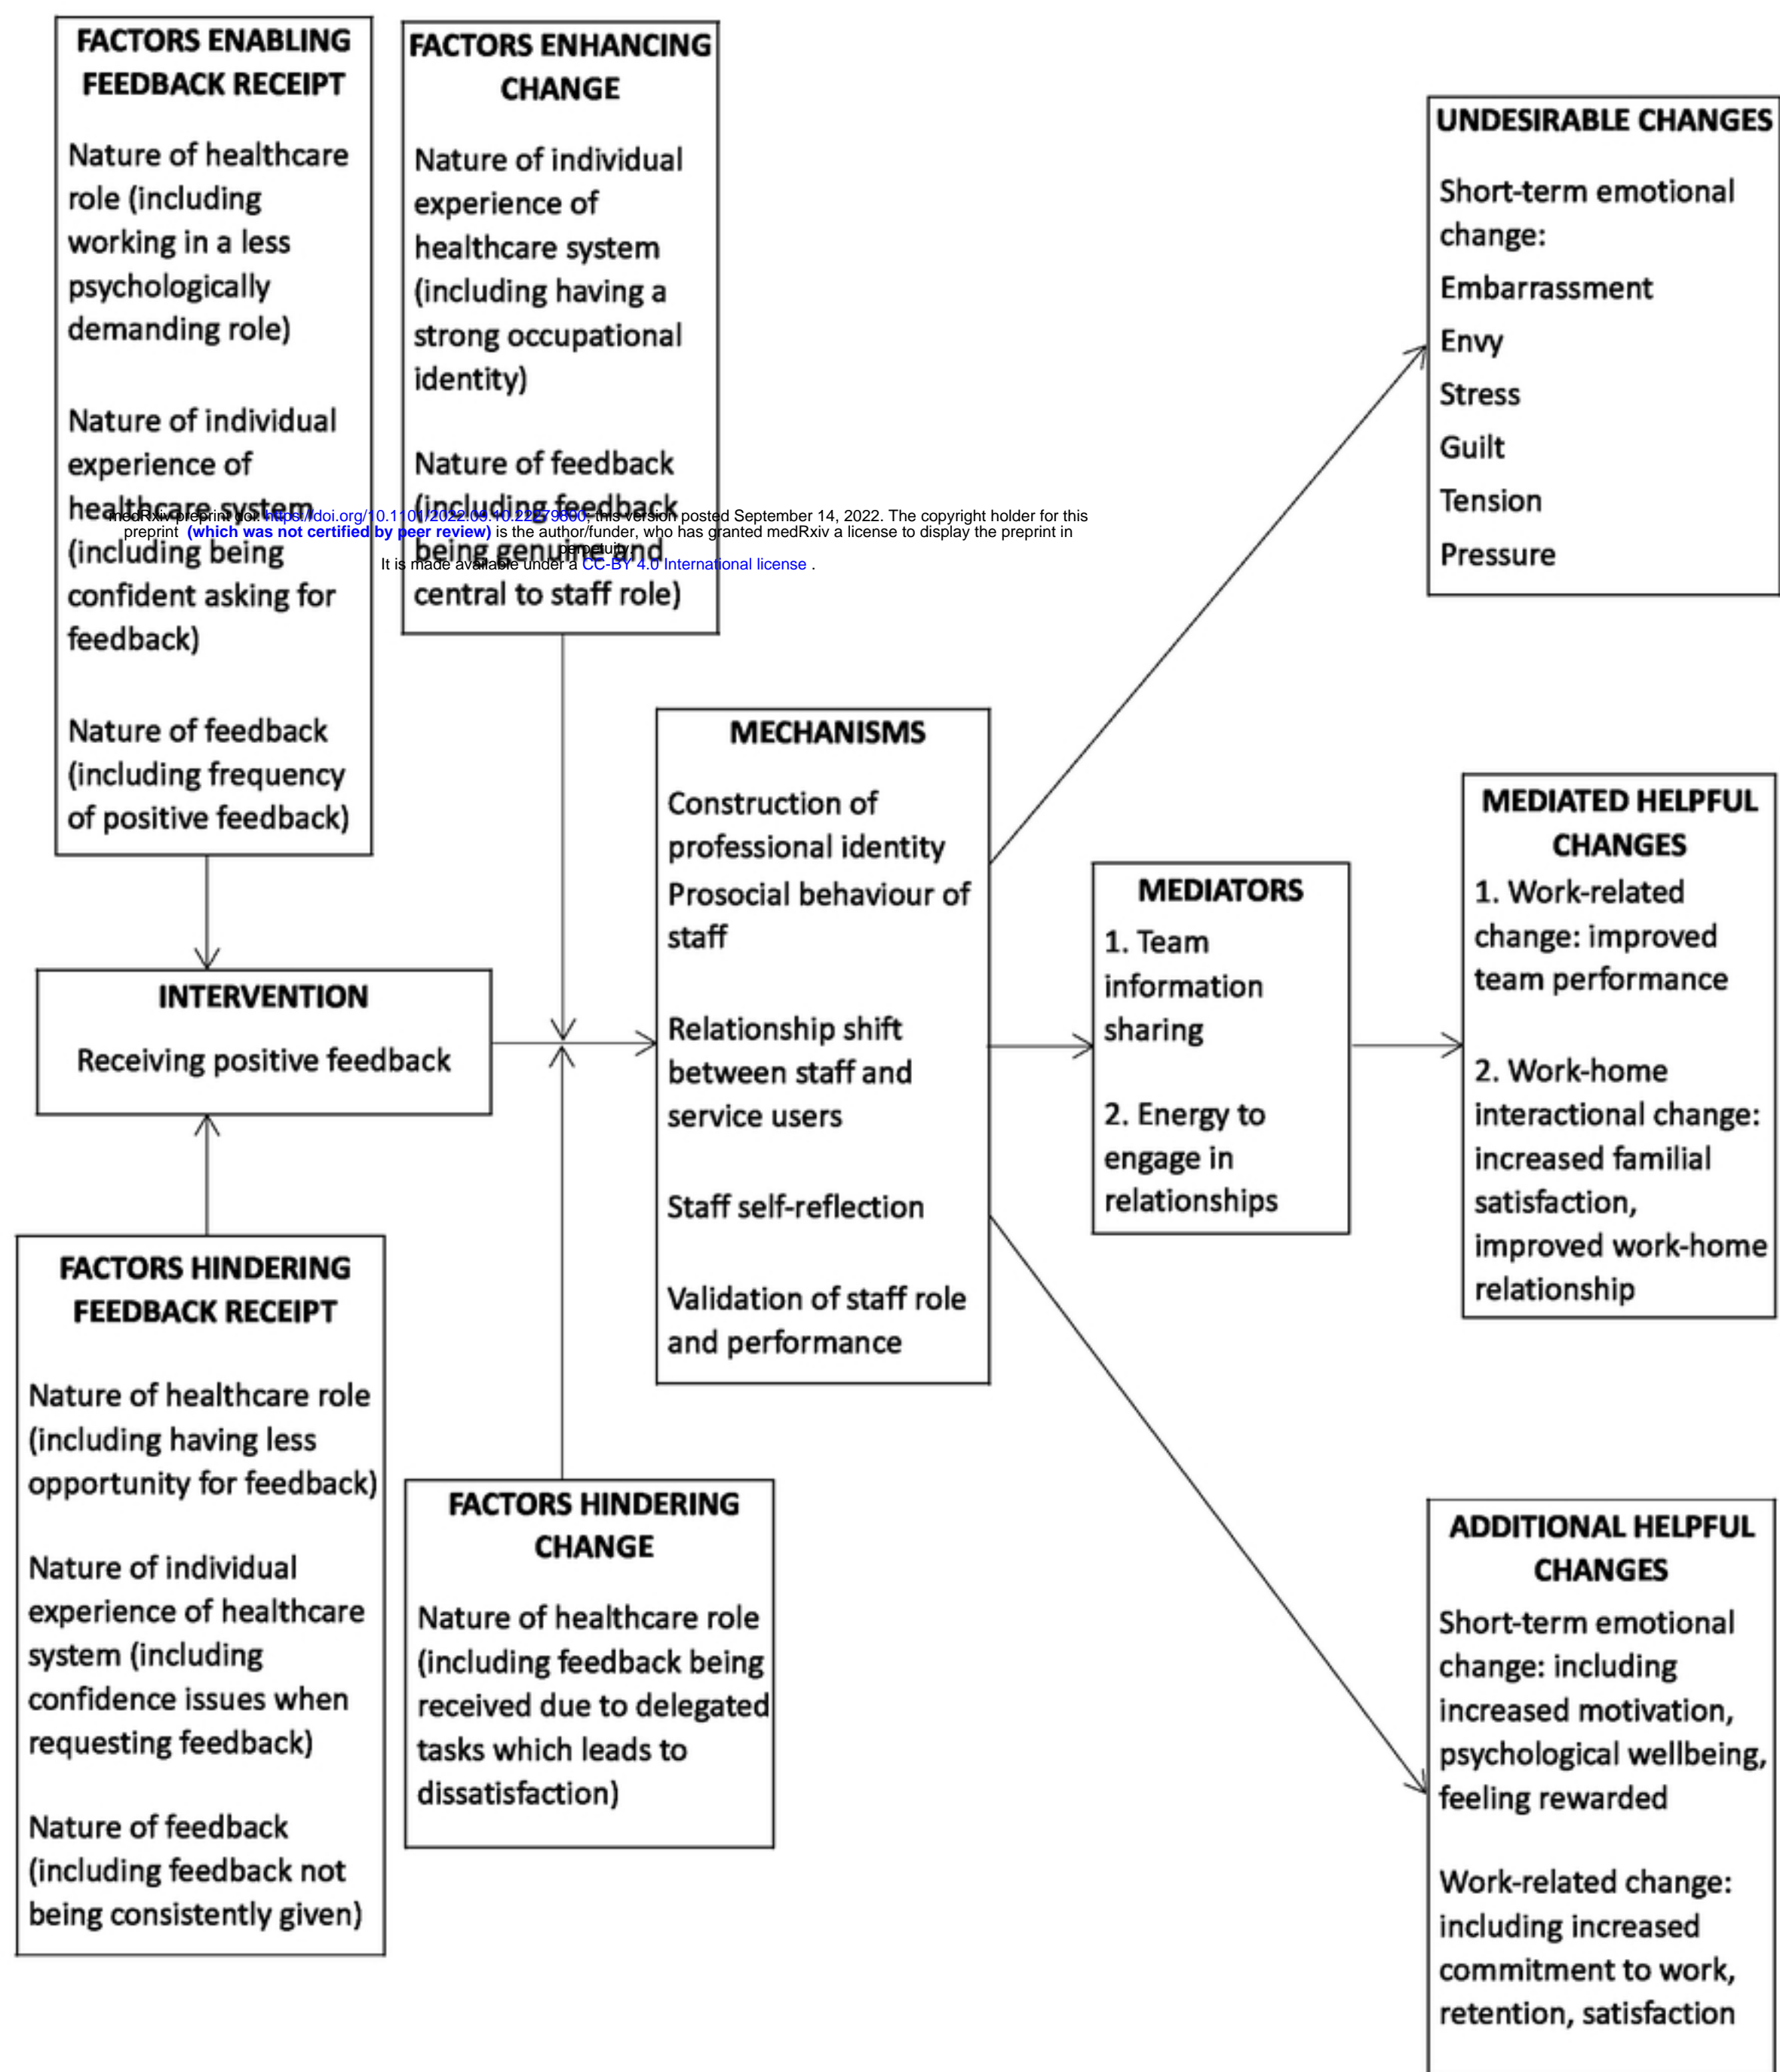

Change model
